# Supplementary material for: Identification and characterisation of non-coding small RNAs in the pathogenic filamentous fungus Trichophyton rubrum
Source: PubMed Central journal article supplement (PMC3890542; doi:10.1186/1471-2164-14-931), 2013-12-30

S3. Potential base-pairing between H/ACA box snoRNAs and rRNAs predicated by snoGPS. Predicated pseudodylation sites are denoted by  $\Psi$ .

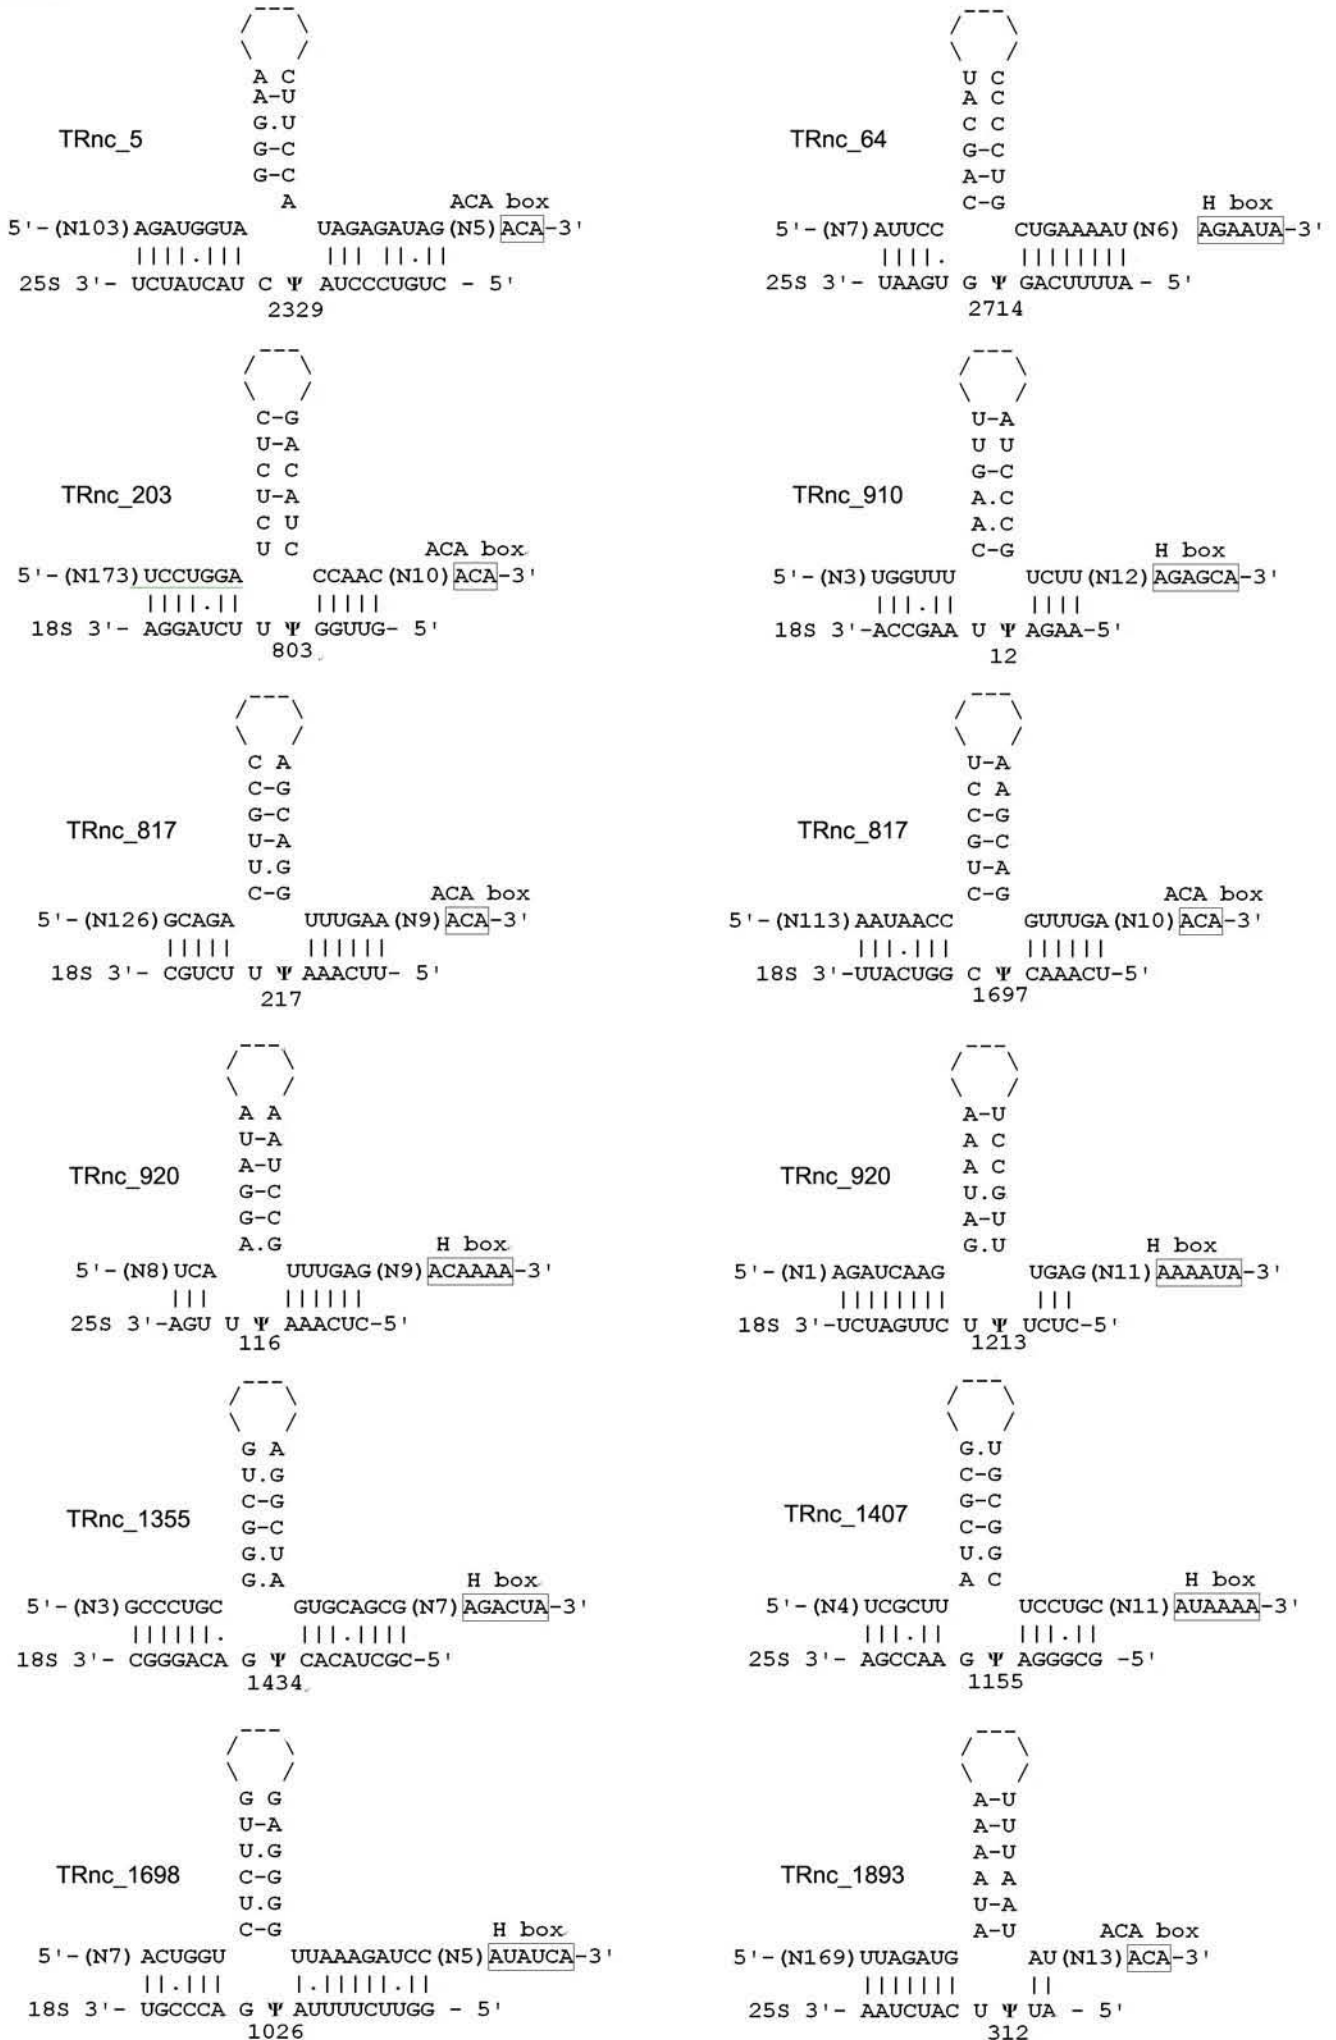



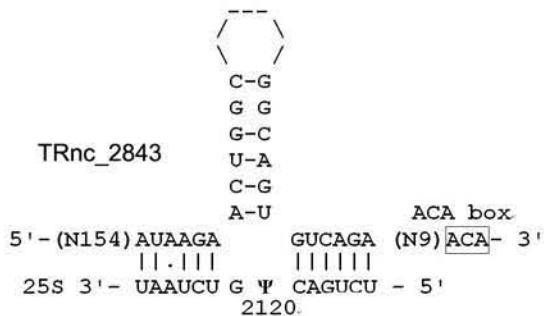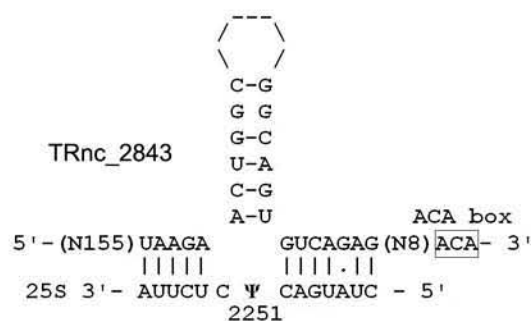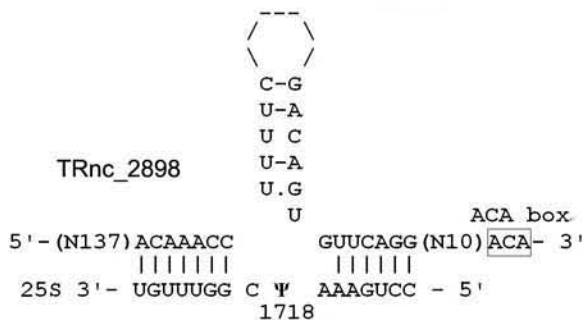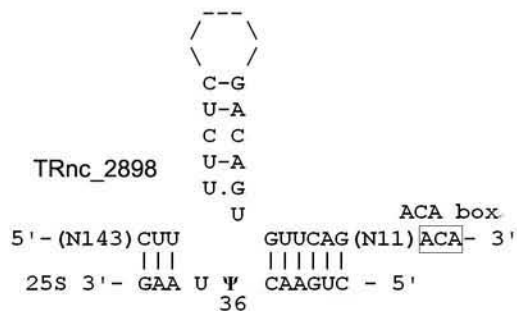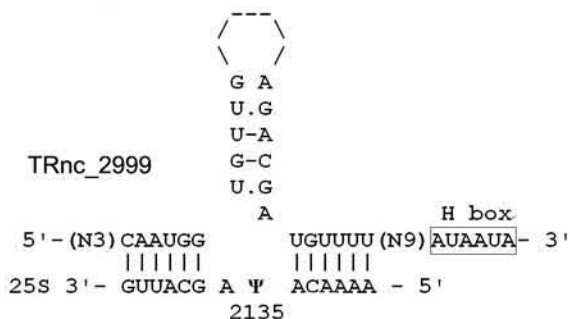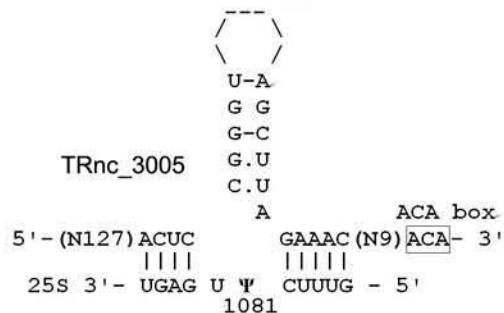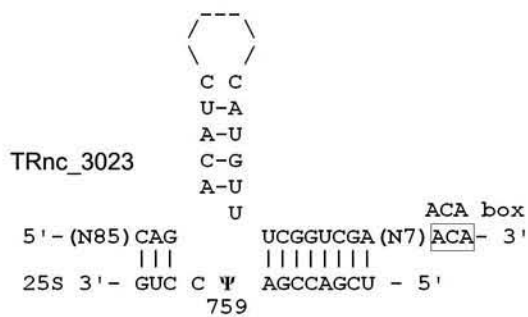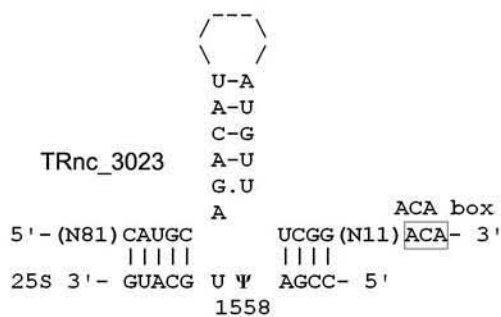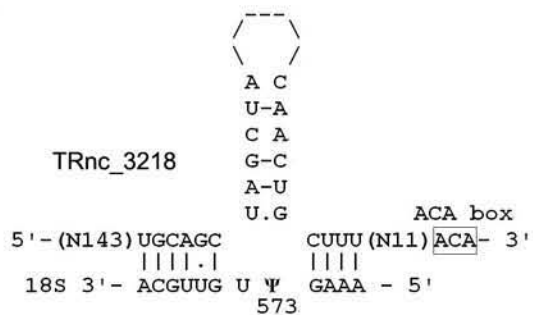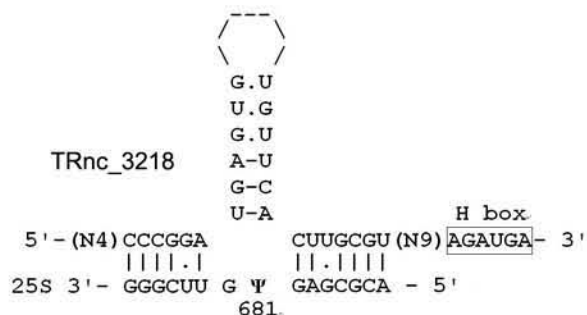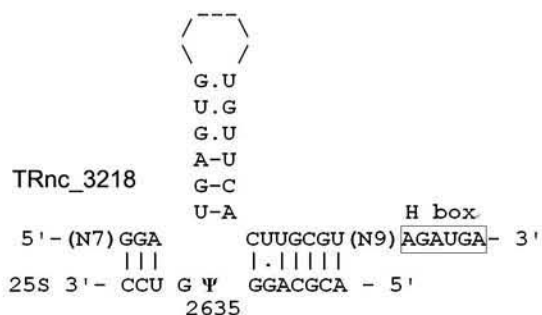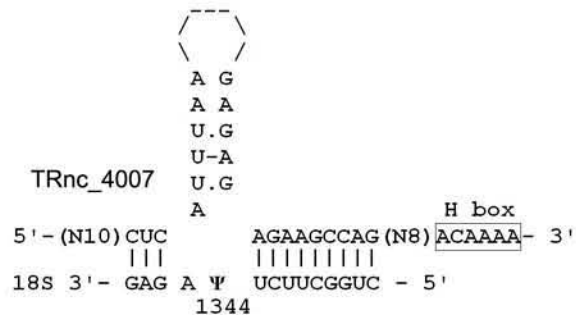

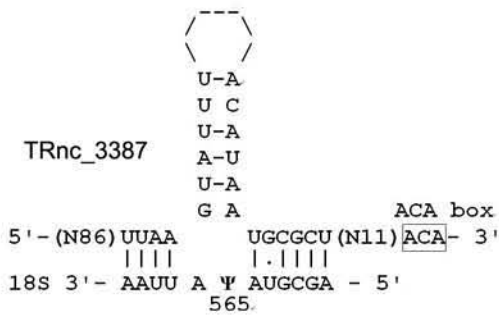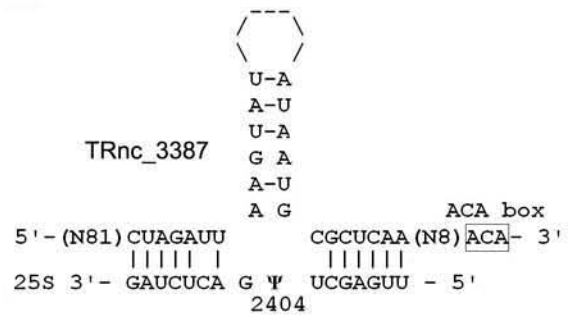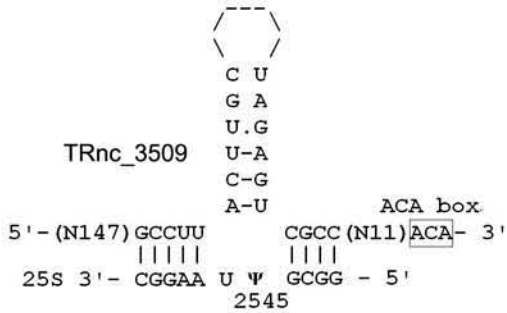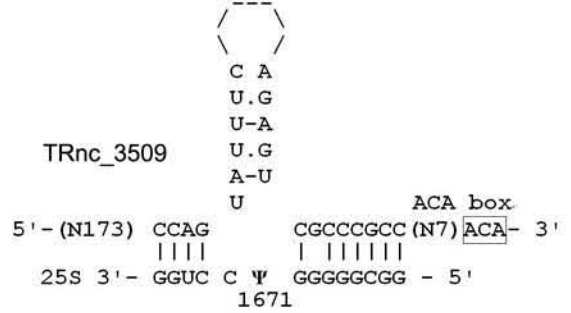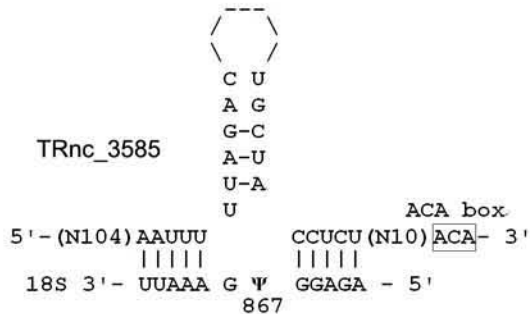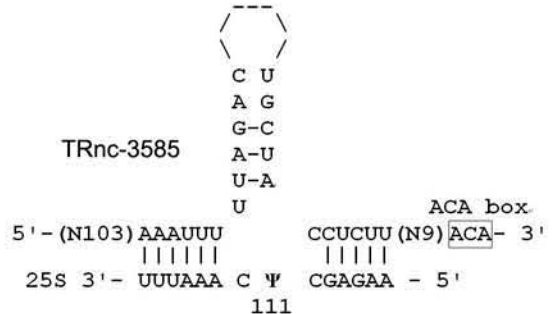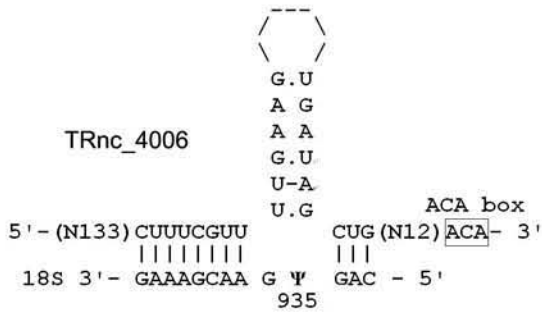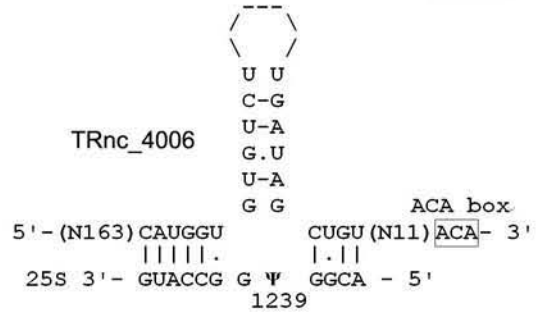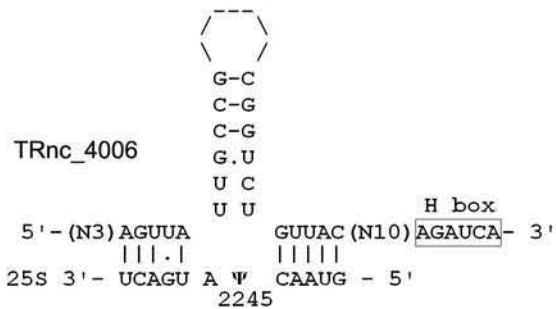

Supplement: 1471-2164-14-931-S3.pdf [file 1471-2164-14-931-S3.pdf]
