# Supplementary material for: Identification and characterisation of non-coding small RNAs in the pathogenic filamentous fungus Trichophyton rubrum
Source: PubMed Central journal article supplement (PMC3890542; doi:10.1186/1471-2164-14-931), 2013-12-30
Supplement: 1471-2164-14-931-S1.pdf [file 1471-2164-14-931-S1.pdf]

## S1. Detail information of ncRNAs identified in *T. rubrum*

| Name     | Gene Bank Accession | Length | Abundance* | Genome Location |               |         | Homology name in Rfam |            |           | Classes |                |
|----------|---------------------|--------|------------|-----------------|---------------|---------|-----------------------|------------|-----------|---------|----------------|
|          |                     |        |            | Reads           | Chromosome    | start   | end                   | position   | Accession |         | Homology Genes |
| Tmc_146  | KC353007            | 222    | Low        | 1               | supercont2.1  | 707117  | 706896                | 3'UTR      | no        | no      | ncRNA          |
| Tmc_184  | KC353011            | 142    | Low        | 1               | supercont2.1  | 887899  | 887758                | 5' UTR     | no        | no      | ncRNA          |
| Tmc_190  | KC353012            | 103    | Low        | 1               | supercont2.1  | 928714  | 928816                | Intron     | no        | no      | ncRNA          |
| Tmc_311  | KC353019            | 221    | Low        | 1               | supercont2.1  | 1541786 | 1541566               | 3'UTR      | no        | no      | ncRNA          |
| Tmc_500  | KC353035            | 203    | Low        | 1               | supercont2.1  | 2298649 | 2298447               | Intron     | no        | no      | ncRNA          |
| Tmc_602  | KC353040            | 84     | Low        | 1               | supercont2.1  | 2678737 | 2678820               | Intergenic | no        | no      | ncRNA          |
| Tmc_611  | KC353042            | 104    | Low        | 1               | supercont2.1  | 2710988 | 2711091               | Intron     | no        | no      | ncRNA          |
| Tmc_691  | KC353047            | 135    | Low        | 1               | supercont2.1  | 3142475 | 3142609               | 5' UTR     | no        | no      | ncRNA          |
| Tmc_718  | KC353048            | 122    | Low        | 1               | supercont2.1  | 3334692 | 3334571               | Intron     | no        | no      | ncRNA          |
| Tmc_733  | KC353049            | 174    | Low        | 1               | supercont2.1  | 3371115 | 3371288               | 3'UTR      | no        | no      | ncRNA          |
| Tmc_821  | KC353055            | 210    | Low        | 1               | supercont2.1  | 3768831 | 3768622               | Intergenic | no        | no      | ncRNA          |
| Tmc_961  | KC353065            | 177    | Low        | 1               | supercont2.10 | 578009  | 577833                | 5'UTR      | no        | no      | ncRNA          |
| Tmc_1098 | KC353073            | 287    | Low        | 1               | supercont2.11 | 256290  | 256576                | 5'UTR      | no        | no      | ncRNA          |
| Tmc_1167 | KC353076            | 177    | Low        | 1               | supercont2.11 | 544895  | 545071                | 3'UTR      | no        | no      | ncRNA          |
| Tmc_1211 | KC353077            | 165    | Low        | 1               | supercont2.11 | 718257  | 718093                | Intron     | no        | no      | ncRNA          |
| Tmc_1243 | KC353080            | 133    | Low        | 1               | supercont2.12 | 145908  | 145776                | Intron     | no        | no      | ncRNA          |
| Tmc_1249 | KC353081            | 165    | Low        | 1               | supercont2.12 | 174997  | 174833                | 5' UTR     | no        | no      | ncRNA          |
| Tmc_1293 | KC353085            | 116    | Low        | 1               | supercont2.13 | 8434    | 8319                  | 3'UTR      | no        | no      | ncRNA          |
| Tmc_1414 | KC353096            | 68     | Low        | 1               | supercont2.16 | 81523   | 81590                 | 3' UTR     | no        | no      | ncRNA          |
| Tmc_1452 | KC353102            | 84     | Low        | 1               | supercont2.18 | 17826   | 17909                 | 5'UTR      | no        | no      | ncRNA          |
| Tmc_1456 | KC353103            | 94     | Low        | 1               | supercont2.18 | 53193   | 53100                 | 3'UTR      | no        | no      | ncRNA          |
| Tmc_1504 | KC353107            | 193    | Low        | 1               | supercont2.2  | 231697  | 231889                | 3'UTR      | no        | no      | ncRNA          |
| Tmc_1509 | KC353108            | 110    | Low        | 1               | supercont2.2  | 284655  | 284546                | Intron     | no        | no      | ncRNA          |
| Tmc_1545 | KC353109            | 192    | Low        | 1               | supercont2.2  | 458300  | 458109                | 5' UTR     | no        | no      | ncRNA          |
| Tmc_1581 | KC353113            | 190    | Low        | 1               | supercont2.2  | 672351  | 672540                | 3'UTR      | no        | no      | ncRNA          |
| Tmc_1634 | KC353117            | 239    | Low        | 1               | supercont2.2  | 983863  | 983625                | 5'UTR      | no        | no      | ncRNA          |
| Tmc_1746 | KC353126            | 250    | Low        | 1               | supercont2.2  | 1640240 | 1640489               | 5'UTR      | no        | no      | ncRNA          |
| Tmc_1811 | KC353136            | 382    | Low        | 1               | supercont2.2  | 1888828 | 1889209               | 3'UTR      | no        | no      | ncRNA          |
| Tmc_2004 | KC353146            | 129    | Low        | 1               | supercont2.3  | 63110   | 63238                 | 3'UTR      | no        | no      | ncRNA          |
| Tmc_2058 | KC353152            | 206    | Low        | 1               | supercont2.3  | 369951  | 369746                | 3'UTR      | no        | no      | ncRNA          |
| Tmc_2115 | KC353155            | 253    | Low        | 1               | supercont2.3  | 581055  | 580803                | 5' UTR     | no        | no      | ncRNA          |
| Tmc_2207 | KC353162            | 89     | Low        | 1               | supercont2.3  | 1060294 | 1060206               | 5' UTR     | no        | no      | ncRNA          |
| Tmc_2347 | KC353168            | 176    | Low        | 1               | supercont2.3  | 1692947 | 1693122               | 5' UTR     | no        | no      | ncRNA          |
| Tmc_2350 | KC353169            | 132    | Low        | 1               | supercont2.3  | 1714306 | 1714175               | 5' UTR     | no        | no      | ncRNA          |
| Tmc_2354 | KC353170            | 152    | Low        | 1               | supercont2.3  | 1735194 | 1735043               | Intron     | no        | no      | ncRNA          |
| Tmc_2366 | KC353171            | 152    | Low        | 1               | supercont2.3  | 1811999 | 1811848               | 3'UTR      | no        | no      | ncRNA          |
| Tmc_2398 | KC353174            | 106    | Low        | 1               | supercont2.3  | 1952087 | 1952192               | Intron     | no        | no      | ncRNA          |
| Tmc_2431 | KC353179            | 166    | Low        | 1               | supercont2.3  | 2070250 | 2070085               | 3'UTR      | no        | no      | ncRNA          |
| Tmc_2437 | KC353180            | 160    | Low        | 1               | supercont2.3  | 2077721 | 2077562               | 3'UTR      | no        | no      | ncRNA          |
| Tmc_2448 | KC353183            | 161    | Low        | 1               | supercont2.3  | 2123075 | 2122915               | 5' UTR     | no        | no      | ncRNA          |
| Tmc_2501 | KC353189            | 223    | Low        | 1               | supercont2.3  | 2469151 | 2468929               | 5' UTR     | no        | no      | ncRNA          |
| Tmc_2683 | KC353215            | 105    | Low        | 1               | supercont2.4  | 172556  | 172660                | Intron     | no        | no      | ncRNA          |
| Tmc_2786 | KC353224            | 152    | Low        | 1               | supercont2.4  | 709864  | 710015                | Intergenic | no        | no      | ncRNA          |
| Tmc_2821 | KC353225            | 268    | Low        | 1               | supercont2.4  | 837487  | 837220                | 5' UTR     | no        | no      | ncRNA          |
| Tmc_2890 | KC353230            | 242    | Low        | 1               | supercont2.4  | 1157692 | 1157451               | Intron     | no        | no      | ncRNA          |
| Tmc_2945 | KC353236            | 166    | Low        | 1               | supercont2.4  | 1420896 | 1421061               | 5'UTR      | no        | no      | ncRNA          |
| Tmc_2952 | KC353237            | 221    | Low        | 1               | supercont2.4  | 1490648 | 1490428               | 3'UTR      | no        | no      | ncRNA          |
| Tmc_3043 | KC353243            | 162    | Low        | 1               | supercont2.4  | 1878388 | 1878227               | 3'UTR      | no        | no      | ncRNA          |
| Tmc_3096 | KC353244            | 201    | Low        | 1               | supercont2.4  | 2153644 | 2153444               | 3'UTR      | no        | no      | ncRNA          |
| Tmc_3149 | KC353249            | 193    | Low        | 1               | supercont2.5  | 305346  | 305154                | 5'UTR      | no        | no      | ncRNA          |
| Tmc_3157 | KC353251            | 177    | Low        | 1               | supercont2.5  | 328773  | 328597                | Intron     | no        | no      | ncRNA          |
| Tmc_3176 | KC353252            | 137    | Low        | 1               | supercont2.5  | 423569  | 423705                | 3'UTR      | no        | no      | ncRNA          |
| Tmc_3178 | KC353253            | 125    | Low        | 1               | supercont2.5  | 430082  | 430206                | 3'UTR      | no        | no      | ncRNA          |
| Tmc_3252 | KC353259            | 228    | Low        | 1               | supercont2.5  | 787932  | 787705                | 3'UTR      | no        | no      | ncRNA          |
| Tmc_3256 | KC353260            | 174    | Low        | 1               | supercont2.5  | 795747  | 795920                | Intergenic | no        | no      | ncRNA          |
| Tmc_3348 | KC353263            | 226    | Low        | 1               | supercont2.5  | 1236562 | 1236337               | 5'UTR      | no        | no      | ncRNA          |
| Tmc_3392 | KC353266            | 180    | Low        | 1               | supercont2.5  | 1543669 | 1543848               | Intron     | no        | no      | ncRNA          |
| Tmc_3468 | KC353271            | 186    | Low        | 1               | supercont2.6  | 313965  | 313780                | 3'UTR      | no        | no      | ncRNA          |
| Tmc_3484 | KC353272            | 141    | Low        | 1               | supercont2.6  | 443757  | 443617                | 3'UTR      | no        | no      | ncRNA          |
| Tmc_3495 | KC353273            | 230    | Low        | 1               | supercont2.6  | 522568  | 522797                | 5'UTR      | no        | no      | ncRNA          |
| Tmc_3579 | KC353277            | 70     | Low        | 1               | supercont2.6  | 1008356 | 1008287               | 3' UTR     | no        | no      | ncRNA          |
| Tmc_3637 | KC353281            | 113    | Low        | 1               | supercont2.6  | 1368764 | 1368876               | 3'UTR      | no        | no      | ncRNA          |
| Tmc_3721 | KC353289            | 155    | Low        | 1               | supercont2.7  | 426292  | 426446                | 3'UTR      | no        | no      | ncRNA          |
| Tmc_3728 | KC353291            | 219    | Low        | 1               | supercont2.7  | 447410  | 447628                | 5'UTR      | no        | no      | ncRNA          |
| Tmc_3807 | KC353297            | 143    | Low        | 1               | supercont2.7  | 1035866 | 1036008               | 5'UTR      | no        | no      | ncRNA          |
| Tmc_3815 | KC353298            | 480    | Low        | 1               | supercont2.7  | 1070408 | 1069929               | 3'UTR      | no        | no      | ncRNA          |
| Tmc_3841 | KC353300            | 209    | Low        | 1               | supercont2.7  | 1169120 | 1169328               | 3'UTR      | no        | no      | ncRNA          |
| Tmc_3851 | KC353302            | 234    | Low        | 1               | supercont2.7  | 1244362 | 1244129               | 3'UTR      | no        | no      | ncRNA          |
| Tmc_4091 | KC353321            | 145    | Low        | 1               | supercont2.8  | 1021753 | 1021609               | 3'UTR      | no        | no      | ncRNA          |
| Tmc_4120 | KC353325            | 141    | Low        | 1               | supercont2.8  | 1178872 | 1178732               | 3'UTR      | no        | no      | ncRNA          |
| Tmc_4160 | KC353327            | 117    | Low        | 1               | supercont2.9  | 169304  | 169420                | 3'UTR      | no        | no      | ncRNA          |
| Tmc_4165 | KC353328            | 173    | Low        | 1               | supercont2.9  | 181512  | 181684                | 3'UTR      | no        | no      | ncRNA          |
| Tmc_4187 | KC353332            | 223    | Low        | 1               | supercont2.9  | 331964  | 331742                | 3'UTR      | no        | no      | ncRNA          |
| Tmc_4219 | KC353335            | 104    | Low        | 1               | supercont2.9  | 449429  | 449532                | 5'UTR      | no        | no      | ncRNA          |
| Tmc_4228 | KC353336            | 123    | Low        | 1               | supercont2.9  | 533214  | 533336                | 5'UTR      | no        | no      | ncRNA          |
| Tmc_4239 | KC353337            | 101    | Low        | 1               | supercont2.9  | 590614  | 590514                | Intron     | no        | no      | ncRNA          |
| Tmc_4339 | KC353350            | 140    | Low        | 1               | supercont2.9  | 1003602 | 1003463               | 3'UTR      | no        | no      | ncRNA          |
| Tmc_20   | KC353000            | 94     | Low        | 1               | supercont2.1  | 48466   | 48559                 | 5'UTR      | no        | no      | ncRNA          |
| Tmc_95   | KC353005            | 242    | Low        | 1               | supercont2.1  | 436682  | 436923                | 3'UTR      | no        | no      | ncRNA          |
| Tmc_149  | KC353008            | 205    | Low        | 1               | supercont2.1  | 709149  | 708945                | 5' UTR     | no        | no      | ncRNA          |
| Tmc_268  | KC353016            | 153    | Low        | 1               | supercont2.1  | 1349728 | 1349576               | 3'UTR      | no        | no      | ncRNA          |
| Tmc_369  | KC353023            | 75     | Low        | 1               | supercont2.1  | 1744719 | 1744645               | 3'UTR      | no        | no      | ncRNA          |
| Tmc_440  | KC353028            | 172    | Low        | 1               | supercont2.1  | 2014865 | 2014694               | 3'UTR      | no        | no      | ncRNA          |
| Tmc_789  | KC353052            | 248    | Low        | 1               | supercont2.1  | 3618013 | 3618260               | 5' UTR     | no        | no      | ncRNA          |

|          |          |     |     |   |               |         |         |            |         |               |                         |
|----------|----------|-----|-----|---|---------------|---------|---------|------------|---------|---------------|-------------------------|
| Tmc_1032 | KC353071 | 85  | Low | 1 | supercont2.10 | 879574  | 879490  | Intron     | no      | no            | ncRNA                   |
| Tmc_1344 | KC353087 | 289 | Low | 1 | supercont2.13 | 260355  | 260643  | 3'UTR      | no      | no            | ncRNA                   |
| Tmc_1463 | KC353104 | 99  | Low | 1 | supercont2.2  | 54765   | 54863   | 3'UTR      | no      | no            | ncRNA                   |
| Tmc_1490 | KC353106 | 128 | Low | 1 | supercont2.2  | 178065  | 178192  | 3'UTR      | no      | no            | ncRNA                   |
| Tmc_1562 | KC353112 | 254 | Low | 1 | supercont2.2  | 553962  | 553709  | 3'UTR      | no      | no            | ncRNA                   |
| Tmc_1639 | KC353118 | 107 | Low | 1 | supercont2.2  | 1019985 | 1019879 | Intergenic | no      | no            | ncRNA                   |
| Tmc_1661 | KC353119 | 169 | Low | 1 | supercont2.2  | 1163041 | 1162873 | Intron     | no      | no            | ncRNA                   |
| Tmc_1736 | KC353125 | 115 | Low | 1 | supercont2.2  | 1574471 | 1574357 | 5'UTR      | no      | no            | ncRNA                   |
| Tmc_1792 | KC353132 | 251 | Low | 1 | supercont2.2  | 1856556 | 1856806 | Intron     | no      | no            | ncRNA                   |
| Tmc_1793 | KC353133 | 136 | Low | 1 | supercont2.2  | 1857072 | 1857207 | 5' UTR     | no      | no            | ncRNA                   |
| Tmc_2100 | KC353154 | 134 | Low | 1 | supercont2.3  | 492158  | 492291  | Intron     | no      | no            | ncRNA                   |
| Tmc_2244 | KC353163 | 93  | Low | 1 | supercont2.3  | 1220514 | 1220606 | 3'UTR      | no      | no            | ncRNA                   |
| Tmc_2489 | KC353187 | 317 | Low | 1 | supercont2.3  | 2384439 | 2384755 | 3'UTR      | no      | no            | ncRNA                   |
| Tmc_2603 | KC353201 | 137 | Low | 1 | supercont2.35 | 73      | 209     | 3'UTR      | no      | no            | ncRNA                   |
| Tmc_2626 | KC353208 | 135 | Low | 1 | supercont2.36 | 11611   | 11745   | Intergenic | no      | no            | ncRNA                   |
| Tmc_2678 | KC353214 | 172 | Low | 1 | supercont2.4  | 127188  | 127017  | 3'UTR      | no      | no            | ncRNA                   |
| Tmc_2704 | KC353218 | 80  | Low | 1 | supercont2.4  | 350218  | 350297  | Intron     | no      | no            | ncRNA                   |
| Tmc_2976 | KC353239 | 132 | Low | 1 | supercont2.4  | 1594325 | 1594194 | 3'UTR      | no      | no            | ncRNA                   |
| Tmc_3100 | KC353245 | 172 | Low | 1 | supercont2.5  | 36493   | 36322   | 5' UTR     | no      | no            | ncRNA                   |
| Tmc_3101 | KC353246 | 136 | Low | 1 | supercont2.5  | 52331   | 52466   | 5'UTR      | no      | no            | ncRNA                   |
| Tmc_3690 | KC353288 | 86  | Low | 1 | supercont2.7  | 222180  | 222095  | 5' UTR     | no      | no            | ncRNA                   |
| Tmc_3795 | KC353296 | 140 | Low | 1 | supercont2.7  | 899924  | 899785  | 3'UTR      | no      | no            | ncRNA                   |
| Tmc_3852 | KC353303 | 92  | Low | 1 | supercont2.7  | 1266049 | 1265958 | 5' UTR     | no      | no            | ncRNA                   |
| Tmc_3923 | KC353309 | 101 | Low | 1 | supercont2.8  | 272917  | 272817  | Intron     | no      | no            | ncRNA                   |
| Tmc_3984 | KC353312 | 92  | Low | 1 | supercont2.8  | 614427  | 614518  | 3'UTR      | no      | no            | ncRNA                   |
| Tmc_3993 | KC353313 | 94  | Low | 1 | supercont2.8  | 638650  | 638743  | 3'UTR      | no      | no            | ncRNA                   |
| Tmc_4052 | KC353318 | 95  | Low | 1 | supercont2.8  | 869939  | 870033  | 5' UTR     | no      | no            | ncRNA                   |
| Tmc_4214 | KC353334 | 141 | Low | 1 | supercont2.9  | 424473  | 424333  | 5'UTR      | no      | no            | ncRNA                   |
| Tmc_2966 | KC353238 | 103 | Low | 1 | supercont2.4  | 1562900 | 1562798 | 3'UTR      | no      | no            | ncRNA                   |
| Tmc_54   | KC353001 | 97  | Low | 1 | supercont2.1  | 188653  | 188749  | 3'UTR      | no      | no            | ncRNA                   |
| Tmc_2504 | KC353190 | 75  | Low | 1 | supercont2.3  | 2479716 | 2479790 | 3'UTR      | RF00461 | IRES_VEGF_A   | ncRNA; Cis-reg          |
| Tmc_3129 | KC353247 | 103 | Low | 1 | supercont2.5  | 190440  | 190542  | 5'UTR      | RF00465 | JEV_hairpin   | ncRNA; Cis-reg          |
| Tmc_2565 | KC353196 | 102 | Low | 1 | supercont2.3  | 2757753 | 2757652 | Intron     | RF01068 | mini-ykkC     | ncRNA; Cis-reg          |
| Tmc_2913 | KC353232 | 82  | Low | 1 | supercont2.4  | 1303343 | 1303262 | Intron     | RF01102 | PK1-TEV_CVMV  | ncRNA; Cis-reg          |
| Tmc_4067 | KC353320 | 86  | Low | 1 | supercont2.8  | 927922  | 927837  | 5'UTR      | RF00043 | Plasmid_R1162 | ncRNA; Cis-reg          |
| Tmc_3269 | KC353261 | 121 | Low | 1 | supercont2.5  | 832731  | 832611  | 3'UTR      | RF00180 | REN-SRE       | ncRNA; Cis-reg          |
| Tmc_682  | KC353045 | 99  | Low | 1 | supercont2.1  | 3064174 | 3064076 | 3'UTR      | RF00506 | Thr_leader    | ncRNA; Cis-reg          |
| Tmc_85   | KC353004 | 110 | Low | 1 | supercont2.1  | 366825  | 366934  | 5' UTR     | RF00506 | Thr_leader    | ncRNA; Cis-reg          |
| Tmc_1611 | KC353116 | 133 | Low | 1 | supercont2.2  | 859642  | 859774  | 5' UTR     | RF01077 | TLS-PK2       | ncRNA; Cis-reg          |
| Tmc_3725 | KC353290 | 139 | Low | 1 | supercont2.7  | 440095  | 439957  | 3'UTR      | RF01088 | TLS-PK5       | ncRNA; Cis-reg          |
| Tmc_155  | KC353009 | 102 | Low | 1 | supercont2.1  | 749414  | 749313  | Intron     | RF00063 | SscA          | ncRNA; SscA RNA         |
| Tmc_1881 | KC353139 | 103 | Low | 1 | supercont2.2  | 2312593 | 2312695 | Intergenic | RF00953 | mir-1497      | ncRNA;pri- or pre-miRNA |
| Tmc_83   | KC353003 | 94  | Low | 1 | supercont2.1  | 365858  | 365951  | 5' UTR     | RF00660 | mir-214       | ncRNA;pri- or pre-miRNA |
| Tmc_465  | KC353029 | 131 | Low | 1 | supercont2.1  | 2097724 | 2097594 | 5'UTR      | RF00660 | mir-214       | ncRNA;pri- or pre-miRNA |
| Tmc_3156 | KC353250 | 91  | Low | 1 | supercont2.5  | 323403  | 323313  | 3'UTR      | RF00660 | mir-214       | ncRNA;pri- or pre-miRNA |
| Tmc_2302 | KC353166 | 93  | Low | 1 | supercont2.3  | 1361651 | 1361743 | Intron     | RF00795 | mir-43        | ncRNA;pri- or pre-miRNA |
| Tmc_739  | KC353050 | 158 | Low | 1 | supercont2.1  | 3402590 | 3402433 | 5'UTR      | RF00746 | mir-454       | ncRNA;pri- or pre-miRNA |
| Tmc_953  | KC353062 | 109 | Low | 1 | supercont2.10 | 557706  | 557598  | Intergenic | RF00889 | MIR533        | ncRNA;pri- or pre-miRNA |
| Tmc_957  | KC353064 | 85  | Low | 1 | supercont2.10 | 559450  | 559366  | Intron     | RF00889 | MIR533        | ncRNA;pri- or pre-miRNA |
| Tmc_1006 | KC353068 | 89  | Low | 1 | supercont2.10 | 740838  | 740750  | 5'UTR      | RF00889 | MIR533        | ncRNA;pri- or pre-miRNA |
| Tmc_3140 | KC353248 | 84  | Low | 1 | supercont2.5  | 259173  | 259090  | 5' UTR     | RF00889 | MIR533        | ncRNA;pri- or pre-miRNA |
| Tmc_3449 | KC353270 | 85  | Low | 1 | supercont2.6  | 164860  | 164776  | 5' UTR     | RF00889 | MIR533        | ncRNA;pri- or pre-miRNA |
| Tmc_4178 | KC353329 | 99  | Low | 1 | supercont2.9  | 276818  | 276916  | Intron     | RF00889 | MIR533        | ncRNA;pri- or pre-miRNA |
| Tmc_385  | KC353024 | 98  | Low | 1 | supercont2.1  | 1818863 | 1818960 | 3'UTR      | RF00990 | mir-552       | ncRNA;pri- or pre-miRNA |
| Tmc_3783 | KC353295 | 80  | Low | 1 | supercont2.7  | 784466  | 784545  | 3'UTR      | RF00990 | mir-552       | ncRNA;pri- or pre-miRNA |
| Tmc_161  | KC353010 | 91  | Low | 1 | supercont2.1  | 792780  | 792870  | 5' UTR     | no      | no            | ncRNA;pri- or pre-miRNA |
| Tmc_252  | KC353015 | 158 | Low | 1 | supercont2.1  | 1248092 | 1247935 | Intron     | RF01059 | mir-598       | ncRNA;pri- or pre-miRNA |
| Tmc_492  | KC353033 | 98  | Low | 1 | supercont2.1  | 2238242 | 2238145 | Intron     | RF01059 | mir-598       | ncRNA;pri- or pre-miRNA |
| Tmc_512  | KC353036 | 195 | Low | 1 | supercont2.1  | 2323310 | 2323504 | Intron     | no      | no            | ncRNA;pri- or pre-miRNA |
| Tmc_2862 | KC353229 | 70  | Low | 1 | supercont2.4  | 1094194 | 1094263 | Intron     | RF01059 | mir-598       | ncRNA;pri- or pre-miRNA |
| Tmc_3569 | KC353275 | 297 | Low | 1 | supercont2.6  | 934438  | 934142  | Intron     | RF01059 | mir-598       | ncRNA;pri- or pre-miRNA |
| Tmc_4208 | KC353333 | 179 | Low | 1 | supercont2.9  | 416906  | 416728  | Intergenic | RF01059 | mir-598       | ncRNA;pri- or pre-miRNA |
| Tmc_1561 | KC353111 | 120 | Low | 1 | supercont2.2  | 547418  | 547537  | 3'UTR      | RF01059 | mir-598       | ncRNA;pri- or pre-miRNA |
| Tmc_1401 | KC353093 | 88  | Low | 1 | supercont2.15 | 158007  | 158094  | 3'UTR      | RF00844 | mir-67        | ncRNA;pri- or pre-miRNA |
| Tmc_478  | KC353031 | 92  | Low | 1 | supercont2.1  | 2144845 | 2144936 | 5'UTR      | no      | no            | ncRNA                   |
| Tmc_3613 | KC353279 | 134 | Low | 1 | supercont2.6  | 1217129 | 1216996 | 5'UTR      | no      | no            | no                      |
| Tmc_3614 | KC353280 | 80  | Low | 1 | supercont2.6  | 1218983 | 1218904 | Intron     | no      | no            | no                      |
| Tmc_3943 | KC353310 | 94  | Low | 1 | supercont2.8  | 378650  | 378557  | Intron     | no      | no            | no                      |
| Tmc_3959 | KC353311 | 82  | Low | 1 | supercont2.8  | 495724  | 495805  | 3'UTR      | no      | no            | no                      |
| Tmc_4002 | KC353315 | 158 | Low | 1 | supercont2.8  | 682342  | 682499  | Intron     | no      | no            | no                      |
| Tmc_1357 | KC353089 | 208 | Low | 1 | supercont2.14 | 153790  | 153997  | 5'UTR      | RF00621 | CoTC_ribozyme | ribozyme                |
| Tmc_313  | KC353020 | 77  | Low | 1 | supercont2.1  | 1543338 | 1543262 | 5' UTR     | RF01118 | PK-G12rRNA    | rRNA                    |
| Tmc_2018 | KC353149 | 306 | Low | 1 | supercont2.3  | 117035  | 116730  | 3'UTR      | no      | no            | snoRNA;CD-box           |
| Tmc_2179 | KC353160 | 431 | Low | 1 | supercont2.3  | 961995  | 961565  | Intergenic | no      | no            | snoRNA;CD-box           |
| Tmc_2283 | KC353165 | 233 | Low | 1 | supercont2.3  | 1301587 | 1301819 | 5' UTR     | no      | no            | snoRNA;CD-box           |
| Tmc_2405 | KC353175 | 317 | Low | 1 | supercont2.3  | 1975149 | 1975465 | 3'UTR      | no      | no            | snoRNA;CD-box           |
| Tmc_2691 | KC353216 | 158 | Low | 1 | supercont2.4  | 233433  | 233276  | Intergenic | no      | no            | snoRNA;CD-box           |
| Tmc_4250 | KC353339 | 192 | Low | 1 | supercont2.9  | 658585  | 658394  | 3'UTR      | no      | no            | snoRNA;CD-box           |
| Tmc_2782 | KC353223 | 128 | Low | 1 | supercont2.4  | 669565  | 669438  | 5' UTR     | RF00630 | P26           | snoRNA;CD-box           |
| Tmc_608  | KC353041 | 234 | Low | 1 | supercont2.1  | 2701229 | 2701462 | 3'UTR      | RF01202 | sn2991        | snoRNA;CD-box           |
| Tmc_3667 | KC353285 | 191 | Low | 1 | supercont2.7  | 59063   | 59253   | 3'UTR      | RF00529 | noMe28S-Am258 | snoRNA;CD-box           |
| Tmc_1603 | KC353115 | 358 | Low | 1 | supercont2.2  | 766347  | 766704  | 3'UTR      | RF00345 | snoR1         | snoRNA;CD-box           |
| Tmc_1709 | KC353124 | 154 | Low | 1 | supercont2.2  | 1400380 | 1400533 | 5' UTR     | RF01193 | snoR20a       | snoRNA;CD-box           |
| Tmc_2027 | KC353150 | 96  | Low | 1 | supercont2.3  | 166668  | 166763  | Intron     | RF01281 | snoR35        | snoRNA;CD-box           |
| Tmc_1449 | KC353101 | 234 | Low | 1 | supercont2.17 | 97081   | 97314   | 5'UTR      | RF01191 | SNORD121A     | snoRNA;CD-box           |
| Tmc_3227 | KC353256 | 139 | Low | 1 | supercont2.5  | 625518  | 625380  | Intron     | RF00594 | SNORD86       | snoRNA;CD-box           |
| Tmc_1299 | KC353086 | 109 | Low | 1 | supercont2.13 | 24837   | 24729   | Intron     | RF00593 | snoU83B       | snoRNA;CD-box           |
| Tmc_3438 | KC353269 | 173 | Low | 1 | supercont2.6  | 91295   | 91467   | 5'UTR      | RF01291 | snoU97        | snoRNA;CD-box           |

|          |          |     |     |   |               |         |         |            |         |                 |                         |
|----------|----------|-----|-----|---|---------------|---------|---------|------------|---------|-----------------|-------------------------|
| Tmc_2011 | KC353147 | 127 | Low | 1 | supercont2.3  | 74633   | 74759   | 3'UTR      | RF00441 | snoZ242         | snoRNA;CD-box           |
| Tmc_4316 | KC353347 | 97  | Low | 1 | supercont2.9  | 861468  | 861372  | 5'UTR      | RF01223 | snR13           | snoRNA;CD-box           |
| Tmc_1366 | KC353091 | 215 | Low | 1 | supercont2.14 | 179253  | 179467  | 3'UTR      | RF01152 | sR1             | snoRNA;CD-box           |
| Tmc_1841 | KC353138 | 143 | Low | 1 | supercont2.2  | 2090171 | 2090313 | 3'UTR      | RF01144 | sR17            | snoRNA;CD-box           |
| Tmc_1560 | KC353110 | 77  | Low | 1 | supercont2.2  | 546818  | 546894  | 3'UTR      | RF01139 | sR2             | snoRNA;CD-box           |
| Tmc_3654 | KC353284 | 191 | Low | 1 | supercont2.7  | 14823   | 15013   | 3'UTR      | RF01140 | sR20            | snoRNA;CD-box           |
| Tmc_3833 | KC353299 | 109 | Low | 1 | supercont2.7  | 1124537 | 1124429 | 3'UTR      | RF01273 | sR34            | snoRNA;CD-box           |
| Tmc_415  | KC353027 | 103 | Low | 1 | supercont2.1  | 1918108 | 1918210 | Intron     | RF01121 | Sr38            | snoRNA;CD-box           |
| Tmc_5    | KC352999 | 289 | Low | 1 | supercont2.1  | 19982   | 20270   | 5' UTR     | no      | no              | snoRNA;HACA-box         |
| Tmc_64   | KC353002 | 306 | Low | 1 | supercont2.1  | 267027  | 267332  | 3'UTR      | no      | no              | snoRNA;HACA-box         |
| Tmc_203  | KC353013 | 308 | Low | 1 | supercont2.1  | 996485  | 996178  | 5' UTR     | no      | no              | snoRNA;HACA-box         |
| Tmc_910  | KC353060 | 468 | Low | 1 | supercont2.10 | 343107  | 343574  | 5'UTR      | no      | no              | snoRNA;HACA-box         |
| Tmc_920  | KC353061 | 310 | Low | 1 | supercont2.10 | 389299  | 389608  | 3'UTR      | no      | no              | snoRNA;HACA-box         |
| Tmc_1355 | KC353088 | 371 | Low | 1 | supercont2.14 | 142837  | 142467  | 5'UTR      | no      | no              | snoRNA;HACA-box         |
| Tmc_2045 | KC353151 | 228 | Low | 1 | supercont2.3  | 296293  | 296520  | 5' UTR     | no      | no              | snoRNA;HACA-box         |
| Tmc_2452 | KC353184 | 323 | Low | 1 | supercont2.3  | 2170039 | 2169717 | 3'UTR      | no      | no              | snoRNA;HACA-box         |
| Tmc_2579 | KC353198 | 349 | Low | 1 | supercont2.23 | 2792710 | 2793058 | 5'UTR      | no      | no              | snoRNA;HACA-box         |
| Tmc_2898 | KC353231 | 393 | Low | 1 | supercont2.4  | 1199167 | 1198775 | Intron     | no      | no              | snoRNA;HACA-box         |
| Tmc_3005 | KC353241 | 214 | Low | 1 | supercont2.4  | 1748930 | 1749143 | 5'UTR      | no      | no              | snoRNA;HACA-box         |
| Tmc_3218 | KC353255 | 332 | Low | 1 | supercont2.5  | 584674  | 585005  | 5'UTR      | no      | no              | snoRNA;HACA-box         |
| Tmc_3387 | KC353265 | 226 | Low | 1 | supercont2.5  | 1472165 | 1472390 | 3'UTR      | no      | no              | snoRNA;HACA-box         |
| Tmc_3509 | KC353274 | 433 | Low | 1 | supercont2.6  | 608530  | 608098  | 5'UTR      | no      | no              | snoRNA;HACA-box         |
| Tmc_3585 | KC353278 | 281 | Low | 1 | supercont2.6  | 1065274 | 1064994 | Intron     | no      | no              | snoRNA;HACA-box         |
| Tmc_1407 | KC353095 | 234 | Low | 1 | supercont2.16 | 54707   | 54474   | 3'UTR      | no      | no              | snoRNA;HACA-box         |
| Tmc_2531 | KC353194 | 75  | Low | 1 | supercont2.3  | 2617075 | 2617001 | Intron     | no      | no              | snoRNA;HACA-box         |
| Tmc_2596 | KC353200 | 324 | Low | 1 | supercont2.3  | 2882125 | 2881802 | 3'UTR      | no      | no              | snoRNA;HACA-box         |
| Tmc_2636 | KC353210 | 203 | Low | 1 | supercont2.36 | 19276   | 19478   | Intergenic | no      | no              | snoRNA;HACA-box         |
| Tmc_2443 | KC353182 | 106 | Low | 1 | supercont2.3  | 2090244 | 2090349 | Intron     | RF00428 | SNORA38         | snoRNA;HACA-box         |
| Tmc_2172 | KC353159 | 126 | Low | 1 | supercont2.3  | 922150  | 922025  | Intron     | RF00406 | SNORA42         | snoRNA;HACA-box         |
| Tmc_1370 | KC353092 | 133 | Low | 1 | supercont2.14 | 187697  | 187565  | 5'UTR      | RF01134 | sR30            | snoRNA;HACA-box         |
| Tmc_568  | KC353038 | 128 | Low | 1 | supercont2.1  | 2533804 | 2533677 | 3'UTR      | RF00565 | SCARNA3         | snoRNA;scRNA            |
| Tmc_411  | KC353026 | 193 | Low | 2 | supercont2.1  | 1899519 | 1899327 | Intergenic | no      | no              | ncRNA                   |
| Tmc_872  | KC353056 | 239 | Low | 2 | supercont2.10 | 23790   | 23552   | 5' UTR     | no      | no              | ncRNA                   |
| Tmc_873  | KC353057 | 164 | Low | 2 | supercont2.10 | 48543   | 48706   | 5'UTR      | no      | no              | ncRNA                   |
| Tmc_877  | KC353058 | 97  | Low | 2 | supercont2.10 | 76955   | 77051   | 3'UTR      | no      | no              | ncRNA                   |
| Tmc_956  | KC353063 | 241 | Low | 2 | supercont2.10 | 559285  | 559525  | 5'UTR      | no      | no              | ncRNA                   |
| Tmc_997  | KC353067 | 216 | Low | 2 | supercont2.10 | 732727  | 732512  | 5' UTR     | no      | no              | ncRNA                   |
| Tmc_1114 | KC353074 | 104 | Low | 2 | supercont2.11 | 328144  | 328247  | 3'UTR      | no      | no              | ncRNA                   |
| Tmc_1415 | KC353097 | 140 | Low | 2 | supercont2.16 | 82202   | 82063   | 5' UTR     | no      | no              | ncRNA                   |
| Tmc_1426 | KC353099 | 193 | Low | 2 | supercont2.16 | 111833  | 111641  | 3'UTR      | no      | no              | ncRNA                   |
| Tmc_1702 | KC353123 | 375 | Low | 2 | supercont2.2  | 1373166 | 1372792 | 3'UTR      | no      | no              | ncRNA                   |
| Tmc_1801 | KC353134 | 209 | Low | 2 | supercont2.2  | 1873103 | 1873311 | Intron     | no      | no              | ncRNA                   |
| Tmc_1939 | KC353143 | 203 | Low | 2 | supercont2.2  | 2642605 | 2642403 | Intergenic | no      | no              | ncRNA                   |
| Tmc_1953 | KC353144 | 348 | Low | 2 | supercont2.2  | 2715124 | 2714777 | 5' UTR     | no      | no              | ncRNA                   |
| Tmc_2014 | KC353148 | 168 | Low | 2 | supercont2.3  | 75171   | 75338   | 3'UTR      | no      | no              | ncRNA                   |
| Tmc_2186 | KC353161 | 84  | Low | 2 | supercont2.3  | 986525  | 986442  | Intron     | no      | no              | ncRNA                   |
| Tmc_2397 | KC353173 | 296 | Low | 2 | supercont2.3  | 1950899 | 1950604 | Intron     | no      | no              | ncRNA                   |
| Tmc_2417 | KC353176 | 215 | Low | 2 | supercont2.3  | 2020355 | 2020141 | Intron     | no      | no              | ncRNA                   |
| Tmc_2463 | KC353185 | 264 | Low | 2 | supercont2.3  | 2177418 | 2177155 | 5'UTR      | no      | no              | ncRNA                   |
| Tmc_2471 | KC353186 | 157 | Low | 2 | supercont2.3  | 2234172 | 2234016 | Intron     | no      | no              | ncRNA                   |
| Tmc_2676 | KC353213 | 156 | Low | 2 | supercont2.4  | 110438  | 110593  | 3'UTR      | no      | no              | ncRNA                   |
| Tmc_2721 | KC353219 | 258 | Low | 2 | supercont2.4  | 476938  | 476681  | 3'UTR      | no      | no              | ncRNA                   |
| Tmc_3643 | KC353282 | 109 | Low | 2 | supercont2.6  | 1430407 | 1430299 | 3'UTR      | no      | no              | ncRNA                   |
| Tmc_3648 | KC353283 | 122 | Low | 2 | supercont2.6  | 1497645 | 1497766 | 3'UTR      | no      | no              | ncRNA                   |
| Tmc_3681 | KC353287 | 188 | Low | 2 | supercont2.7  | 185159  | 185346  | 3'UTR      | no      | no              | ncRNA                   |
| Tmc_3909 | KC353307 | 355 | Low | 2 | supercont2.8  | 190791  | 191145  | 5' UTR     | no      | no              | ncRNA                   |
| Tmc_4066 | KC353319 | 230 | Low | 2 | supercont2.8  | 925945  | 926174  | 3'UTR      | no      | no              | ncRNA                   |
| Tmc_4093 | KC353322 | 141 | Low | 2 | supercont2.8  | 1041751 | 1041891 | 3'UTR      | no      | no              | ncRNA                   |
| Tmc_4106 | KC353323 | 126 | Low | 2 | supercont2.8  | 1131640 | 1131765 | 5' UTR     | no      | no              | ncRNA                   |
| Tmc_4247 | KC353338 | 193 | Low | 2 | supercont2.9  | 612229  | 612421  | 5' UTR     | no      | no              | ncRNA                   |
| Tmc_401  | KC353025 | 225 | Low | 2 | supercont2.1  | 1846758 | 1846534 | 3'UTR      | no      | no              | ncRNA                   |
| Tmc_589  | KC353039 | 284 | Low | 2 | supercont2.1  | 2667010 | 2666727 | 3'UTR      | no      | no              | ncRNA                   |
| Tmc_1213 | KC353078 | 327 | Low | 2 | supercont2.11 | 755714  | 755388  | 3'UTR      | no      | no              | ncRNA                   |
| Tmc_1231 | KC353079 | 156 | Low | 2 | supercont2.12 | 110235  | 110390  | 3'UTR      | no      | no              | ncRNA                   |
| Tmc_1403 | KC353094 | 134 | Low | 2 | supercont2.16 | 20810   | 20677   | 3'UTR      | no      | no              | ncRNA                   |
| Tmc_1772 | KC353128 | 202 | Low | 2 | supercont2.2  | 1787764 | 1787563 | 3'UTR      | no      | no              | ncRNA                   |
| Tmc_1808 | KC353135 | 283 | Low | 2 | supercont2.2  | 1884802 | 1885084 | Intron     | no      | no              | ncRNA                   |
| Tmc_1887 | KC353140 | 184 | Low | 2 | supercont2.2  | 2365061 | 2364878 | 5'UTR      | no      | no              | ncRNA                   |
| Tmc_2136 | KC353157 | 159 | Low | 2 | supercont2.3  | 717783  | 717941  | 5' UTR     | no      | no              | ncRNA                   |
| Tmc_2376 | KC353172 | 123 | Low | 2 | supercont2.3  | 1846538 | 1846660 | 5' UTR     | no      | no              | ncRNA                   |
| Tmc_2522 | KC353191 | 106 | Low | 2 | supercont2.3  | 2580763 | 2580658 | 3'UTR      | no      | no              | ncRNA                   |
| Tmc_2649 | KC353212 | 79  | Low | 2 | supercont2.36 | 23976   | 24054   | Intergenic | no      | no              | ncRNA                   |
| Tmc_2778 | KC353222 | 126 | Low | 2 | supercont2.4  | 658938  | 658813  | 5'UTR      | no      | no              | ncRNA                   |
| Tmc_3782 | KC353294 | 96  | Low | 2 | supercont2.7  | 784365  | 784460  | 3'UTR      | no      | no              | ncRNA                   |
| Tmc_1777 | KC353130 | 206 | Low | 2 | supercont2.2  | 1789893 | 1789688 | 3'UTR      | RF00458 | IRES_Cripavirus | ncRNA; Cis-reg          |
| Tmc_206  | KC353014 | 109 | Low | 2 | supercont2.1  | 1002398 | 1002506 | Intron     | RF00889 | MIR533          | ncRNA;pri- or pre-miRNA |
| Tmc_2918 | KC353233 | 160 | Low | 2 | supercont2.4  | 1319018 | 1319177 | 5'UTR      | RF00889 | MIR533          | ncRNA;pri- or pre-miRNA |
| Tmc_112  | KC353006 | 100 | Low | 2 | supercont2.1  | 553233  | 553134  | 3'UTR      | RF01059 | mir-598         | ncRNA;pri- or pre-miRNA |
| Tmc_685  | KC353046 | 100 | Low | 2 | supercont2.1  | 3092534 | 3092633 | Intron     | RF01059 | mir-598         | ncRNA;pri- or pre-miRNA |
| Tmc_1983 | KC353145 | 86  | Low | 2 | supercont2.2  | 2887537 | 2887452 | 3'UTR      | RF01059 | mir-598         | ncRNA;pri- or pre-miRNA |
| Tmc_2700 | KC353217 | 128 | Low | 2 | supercont2.4  | 311242  | 311115  | Intron     | RF01010 | mir-632         | ncRNA;pri- or pre-miRNA |
| Tmc_3844 | KC353301 | 102 | Low | 2 | supercont2.7  | 1201652 | 1201551 | Intron     | no      | no              | no                      |
| Tmc_2569 | KC353197 | 192 | Low | 2 | supercont2.3  | 2759920 | 2759729 | Intron     | no      | no              | snoRNA;CD-box           |
| Tmc_2498 | KC353188 | 172 | Low | 2 | supercont2.3  | 2451919 | 2452090 | 5'UTR      | RF00527 | snoMe28S-G3255  | snoRNA;CD-box           |
| Tmc_985  | KC353066 | 153 | Low | 2 | supercont2.10 | 686423  | 686575  | Intron     | RF00494 | snoU2_19        | snoRNA;CD-box           |
| Tmc_640  | KC353043 | 129 | Low | 2 | supercont2.1  | 2869815 | 2869687 | 3'UTR      | RF00300 | snoZ221         | snoRNA;CD-box           |
| Tmc_1272 | KC353084 | 265 | Low | 2 | supercont2.12 | 280712  | 280448  | Intron     | RF01152 | sR1             | snoRNA;CD-box           |
| Tmc_2594 | KC353199 | 143 | Low | 2 | supercont2.3  | 2859175 | 2859033 | Intron     | RF01305 | sR51            | snoRNA;CD-box           |

|          |          |     |      |      |               |         |         |            |         |               |                         |
|----------|----------|-----|------|------|---------------|---------|---------|------------|---------|---------------|-------------------------|
| Tmc_2606 | KC353202 | 280 | Low  | 2    | supercont2.36 | 2106    | 2385    | Intergenic | no      | no            | snoRNA:HACA-box         |
| Tmc_3023 | KC353242 | 182 | Low  | 2    | supercont2.4  | 1839416 | 1839597 | 3'UTR      | no      | no            | snoRNA:HACA-box         |
| Tmc_2640 | KC353211 | 71  | Low  | 2    | supercont2.36 | 21309   | 21379   | Intergenic | RF00005 | tRNA          | tRNA                    |
| Tmc_1423 | KC353098 | 305 | Low  | 3    | supercont2.16 | 86158   | 86462   | 3'UTR      | no      | no            | ncRNA                   |
| Tmc_2126 | KC353156 | 236 | Low  | 3    | supercont2.3  | 651208  | 650973  | Intron     | no      | no            | ncRNA                   |
| Tmc_2757 | KC353220 | 89  | Low  | 3    | supercont2.4  | 610530  | 610618  | 3'UTR      | no      | no            | ncRNA                   |
| Tmc_477  | KC353030 | 151 | Low  | 3    | supercont2.1  | 2139613 | 2139463 | 3'UTR      | no      | no            | ncRNA                   |
| Tmc_2438 | KC353181 | 460 | Low  | 3    | supercont2.3  | 2078096 | 2078555 | 5' UTR     | no      | no            | ncRNA                   |
| Tmc_2776 | KC353221 | 186 | Low  | 3    | supercont2.4  | 655157  | 655342  | 5'UTR      | no      | no            | ncRNA                   |
| Tmc_3228 | KC353257 | 204 | Low  | 3    | supercont2.5  | 659623  | 659420  | 3'UTR      | no      | no            | ncRNA                   |
| Tmc_4338 | KC353349 | 135 | Low  | 3    | supercont2.9  | 997085  | 996951  | 5'UTR      | RF01059 | mir-598       | ncRNA;pri- or pre-miRNA |
| Tmc_3911 | KC353308 | 80  | Low  | 3    | supercont2.8  | 194694  | 194773  | Intron     | RF00213 | snoR38        | snoRNA;CD-box           |
| Tmc_3855 | KC353305 | 288 | Low  | 3    | supercont2.7  | 1281447 | 1281734 | Intron     | RF01127 | sR42          | snoRNA;CD-box           |
| Tmc_1698 | KC353122 | 360 | Low  | 3    | supercont2.2  | 1345609 | 1345968 | Intron     | no      | no            | snoRNA:HACA-box         |
| Tmc_488  | KC353032 | 95  | Low  | 4    | supercont2.1  | 2219199 | 2219293 | 3'UTR      | no      | no            | ncRNA                   |
| Tmc_553  | KC353037 | 200 | Low  | 4    | supercont2.1  | 2462913 | 2462714 | 5' UTR     | no      | no            | ncRNA                   |
| Tmc_1771 | KC353127 | 219 | Low  | 4    | supercont2.2  | 1787241 | 1787023 | 3'UTR      | no      | no            | ncRNA                   |
| Tmc_2609 | KC353203 | 255 | Low  | 4    | supercont2.36 | 4048    | 4302    | Intergenic | no      | no            | ncRNA                   |
| Tmc_3382 | KC353264 | 286 | Low  | 4    | supercont2.5  | 1463205 | 1462920 | Intron     | no      | no            | ncRNA                   |
| Tmc_4150 | KC353326 | 398 | Low  | 4    | supercont2.9  | 166263  | 165866  | 5' UTR     | no      | no            | ncRNA                   |
| Tmc_1688 | KC353121 | 223 | Low  | 4    | supercont2.2  | 1314492 | 1314270 | 3'UTR      | no      | no            | ncRNA                   |
| Tmc_1888 | KC353141 | 290 | Low  | 4    | supercont2.2  | 2381176 | 2381465 | 3'UTR      | no      | no            | ncRNA                   |
| Tmc_2523 | KC353192 | 270 | Low  | 4    | supercont2.3  | 2581274 | 2581005 | Intron     | RF00684 | mir-122       | ncRNA;pri- or pre-miRNA |
| Tmc_2163 | KC353158 | 137 | Low  | 4    | supercont2.3  | 874758  | 874894  | Intron     | RF00647 | MIR164        | ncRNA;pri- or pre-miRNA |
| Tmc_1089 | KC353072 | 145 | Low  | 4    | supercont2.11 | 218126  | 217982  | Intron     | RF01059 | mir-598       | ncRNA;pri- or pre-miRNA |
| Tmc_2999 | KC353240 | 290 | Low  | 4    | supercont2.4  | 1720998 | 1721287 | 5'UTR      | no      | no            | snoRNA:HACA-box         |
| Tmc_4007 | KC353317 | 239 | Low  | 4    | supercont2.8  | 722404  | 722166  | 3'UTR      | no      | no            | snoRNA:HACA-box         |
| Tmc_3999 | KC353314 | 178 | Low  | 5    | supercont2.8  | 672734  | 672557  | 3'UTR      | no      | no            | ncRNA                   |
| Tmc_1271 | KC353083 | 242 | Low  | 5    | supercont2.12 | 280437  | 280196  | Intron     | RF01152 | sR1           | snoRNA;CD-box           |
| Tmc_2618 | KC353205 | 322 | Low  | 5    | supercont2.36 | 8062    | 8383    | Intergenic | no      | no            | snoRNA:HACA-box         |
| Tmc_2075 | KC353153 | 96  | Low  | 5    | supercont2.3  | 425677  | 425772  | Intron     | RF00405 | SNORA44       | snoRNA:HACA-box         |
| Tmc_2309 | KC353167 | 94  | Low  | 6    | supercont2.3  | 1380352 | 1380445 | 5'UTR      | no      | no            | ncRNA                   |
| Tmc_2935 | KC353234 | 162 | Low  | 9    | supercont2.4  | 1403494 | 1403333 | Intron     | RF00220 | Rhino_CRE     | ncRNA; Cis-reg          |
| Tmc_1776 | KC353129 | 326 | Low  | 9    | supercont2.2  | 1789188 | 1788863 | 3'UTR      | RF01231 | snoR74        | snoRNA:HACA-box         |
| Tmc_4267 | KC353346 | 100 | Low  | 10   | supercont2.9  | 703004  | 703103  | 3'UTR      | no      | no            | snoRNA;CD-box           |
| Tmc_3297 | KC353262 | 138 | Low  | 12   | supercont2.5  | 896392  | 896529  | 3'UTR      | RF00610 | SNORD110      | snoRNA;CD-box           |
| Tmc_2936 | KC353235 | 246 | Low  | 16   | supercont2.4  | 1403883 | 1403638 | Intron     | RF00312 | snoZ206       | snoRNA;CD-box           |
| Tmc_1596 | KC353114 | 611 | Low  | 18   | supercont2.2  | 739588  | 740198  | 3'UTR      | no      | no            | ncRNA                   |
| Tmc_494  | KC353034 | 170 | Low  | 20   | supercont2.1  | 2239950 | 2240119 | 5' UTR     | RF01059 | mir-598       | ncRNA;pri- or pre-miRNA |
| Tmc_1893 | KC353142 | 344 | Low  | 21   | supercont2.2  | 2393882 | 2393539 | 3'UTR      | no      | no            | snoRNA:HACA-box         |
| Tmc_2419 | KC353177 | 204 | Low  | 22   | supercont2.3  | 2045771 | 2045974 | 5'UTR      | RF01125 | sR4           | snoRNA;CD-box           |
| Tmc_4113 | KC353324 | 681 | Low  | 22   | supercont2.8  | 1152047 | 1152727 | Intron     | RF01274 | sR45          | snoRNA;CD-box           |
| Tmc_2614 | KC353204 | 285 | Low  | 23   | supercont2.36 | 5177    | 5461    | Intergenic | no      | no            | ncRNA                   |
| Tmc_4264 | KC353345 | 88  | Low  | 23   | supercont2.9  | 696179  | 696266  | 5'UTR      | RF01207 | snR73         | snoRNA;CD-box           |
| Tmc_892  | KC353059 | 182 | Low  | 23   | supercont2.10 | 182361  | 182542  | 3'UTR      | RF00005 | tRNA          | tRNA                    |
| Tmc_2545 | KC353195 | 119 | Low  | 27   | supercont2.3  | 2657688 | 2657806 | 3'UTR      | RF01188 | snR56         | snoRNA;CD-box           |
| Tmc_4006 | KC353316 | 251 | Low  | 28   | supercont2.8  | 710950  | 711200  | Intron     | RF01263 | snR191        | snoRNA:HACA-box         |
| Tmc_3778 | KC353293 | 101 | Low  | 31   | supercont2.7  | 777627  | 777727  | 5' UTR     | RF00471 | snosnR48      | snoRNA;CD-box           |
| Tmc_3179 | KC353254 | 207 | Low  | 39   | supercont2.5  | 431925  | 431719  | 3'UTR      | no      | no            | ncRNA                   |
| Tmc_315  | KC353021 | 740 | Low  | 40   | supercont2.1  | 1544520 | 1545259 | 3'UTR      | no      | no            | ncRNA                   |
| Tmc_1008 | KC353069 | 419 | Low  | 41   | supercont2.10 | 748640  | 749058  | 3'UTR      | RF00030 | RNase_MRP     | ribozyme                |
| Tmc_3741 | KC353292 | 180 | Low  | 42   | supercont2.7  | 491853  | 492032  | 3'UTR      | RF01247 | snR32         | snoRNA:HACA-box         |
| Tmc_1157 | KC353075 | 95  | Low  | 43   | supercont2.11 | 539262  | 539356  | Intron     | RF00093 | SNORD18       | snoRNA;CD-box           |
| Tmc_338  | KC353022 | 135 | Low  | 44   | supercont2.1  | 1643180 | 1643314 | Intron     | RF01223 | snR13         | snoRNA;CD-box           |
| Tmc_2843 | KC353227 | 225 | Low  | 56   | supercont2.4  | 976176  | 976400  | 3'UTR      | RF01251 | snR3          | snoRNA:HACA-box         |
| Tmc_1010 | KC353070 | 87  | Low  | 80   | supercont2.10 | 749220  | 749306  | 3'UTR      | RF00477 | snosnR66      | snoRNA;CD-box           |
| Tmc_3425 | KC353267 | 202 | Low  | 94   | supercont2.6  | 22581   | 22782   | 3'UTR      | no      | no            | snoRNA;CD-box           |
| Tmc_2621 | KC353206 | 406 | Low  | 97   | supercont2.36 | 8934    | 9339    | Intergenic | no      | no            | snoRNA:HACA-box         |
| Tmc_1252 | KC353082 | 181 | High | 104  | supercont2.12 | 182834  | 182654  | 3'UTR      | no      | no            | ncRNA                   |
| Tmc_1686 | KC353120 | 133 | High | 126  | supercont2.2  | 1303987 | 1304119 | 3'UTR      | no      | no            | ncRNA                   |
| Tmc_4179 | KC353330 | 657 | High | 129  | supercont2.9  | 277309  | 276653  | Intron     | no      | no            | ncRNA                   |
| Tmc_4180 | KC353331 | 467 | High | 129  | supercont2.9  | 277728  | 277262  | Intron     | no      | no            | ncRNA                   |
| Tmc_4336 | KC353348 | 162 | High | 137  | supercont2.9  | 996654  | 996493  | Intron     | no      | no            | snoRNA;CD-box           |
| Tmc_3573 | KC353276 | 95  | High | 147  | supercont2.6  | 964586  | 964680  | Intron     | RF00530 | noMe28S-Cm264 | snoRNA;CD-box           |
| Tmc_1437 | KC353100 | 264 | High | 153  | supercont2.17 | 13253   | 15593   | Intergenic | RF00015 | U4            | snoRNA;splicing         |
| Tmc_4260 | KC353341 | 95  | High | 163  | supercont2.9  | 695194  | 695288  | Intergenic | RF01178 | snoR77Y       | snoRNA;CD-box           |
| Tmc_774  | KC353051 | 201 | High | 163  | supercont2.1  | 3545014 | 3545214 | 3'UTR      | RF00004 | U2            | snoRNA;splicing         |
| Tmc_1472 | KC353105 | 188 | High | 170  | supercont2.2  | 69663   | 69850   | 3'UTR      | RF01258 | snR10         | snoRNA:HACA-box         |
| Tmc_2265 | KC353164 | 87  | High | 187  | supercont2.3  | 1276133 | 1276219 | Intron     | RF01197 | snR39         | snoRNA;CD-box           |
| Tmc_1825 | KC353137 | 309 | High | 200  | supercont2.2  | 1958330 | 1958022 | 3'UTR      | no      | no            | snoRNA;CD-box           |
| Tmc_2844 | KC353228 | 239 | High | 225  | supercont2.4  | 981025  | 981263  | 5' UTR     | no      | no            | ncRNA                   |
| Tmc_3677 | KC353286 | 152 | High | 225  | supercont2.7  | 144593  | 144744  | Intron     | no      | no            | ncRNA                   |
| Tmc_2622 | KC353207 | 87  | High | 258  | supercont2.36 | 10861   | 10947   | Intergenic | RF00005 | tRNA          | tRNA                    |
| Tmc_2526 | KC353193 | 321 | High | 288  | supercont2.3  | 2582456 | 2582136 | 3'UTR      | no      | no            | ncRNA                   |
| Tmc_1359 | KC353090 | 97  | High | 290  | supercont2.14 | 159345  | 159441  | Intron     | RF00475 | snosnR69      | snoRNA;CD-box           |
| Tmc_2633 | KC353209 | 597 | High | 297  | supercont2.36 | 17132   | 17728   | Intergenic | no      | no            | ncRNA                   |
| Tmc_817  | KC353054 | 188 | High | 323  | supercont2.1  | 3719705 | 3719892 | 3'UTR      | no      | no            | snoRNA:HACA-box         |
| Tmc_4263 | KC353344 | 157 | High | 486  | supercont2.9  | 695917  | 696073  | Intergenic | RF00086 | SNORD27       | snoRNA;CD-box           |
| Tmc_305  | KC353018 | 97  | High | 579  | supercont2.1  | 1515685 | 1515781 | Intron     | no      | no            | ncRNA                   |
| Tmc_4262 | KC353343 | 273 | High | 603  | supercont2.9  | 695588  | 695860  | Intergenic | RF01185 | snR75         | snoRNA;CD-box           |
| Tmc_3237 | KC353258 | 164 | High | 673  | supercont2.5  | 722162  | 721999  | Intron     | no      | no            | ncRNA                   |
| Tmc_3426 | KC353268 | 98  | High | 761  | supercont2.6  | 23000   | 23097   | 3'UTR      | no      | no            | snoRNA;CD-box           |
| Tmc_4259 | KC353340 | 104 | High | 892  | supercont2.9  | 693331  | 693434  | 5' UTR     | RF00276 | SNORD52       | snoRNA;CD-box           |
| Tmc_293  | KC353017 | 116 | High | 917  | supercont2.1  | 1477742 | 1477627 | 3'UTR      | no      | no            | ncRNA                   |
| Tmc_801  | KC353053 | 488 | High | 919  | supercont2.1  | 3681448 | 3681935 | 3'UTR      | RF00012 | U3            | snoRNA;CD-box           |
| Tmc_3853 | KC353304 | 192 | High | 944  | supercont2.7  | 1268084 | 1268275 | 3'UTR      | no      | no            | ncRNA                   |
| Tmc_2421 | KC353178 | 182 | High | 1060 | supercont2.3  | 2046135 | 2046316 | 5' UTR     | RF00016 | SNORD14       | snoRNA;CD-box           |
| Tmc_3904 | KC353306 | 196 | High | 1238 | supercont2.8  | 159538  | 159733  | 5'UTR      | RF00003 | U1            | snoRNA;splicing         |
| Tmc_4261 | KC353342 | 138 | High | 5548 | supercont2.9  | 695445  | 695582  | Intergenic | RF01209 | snR76         | snoRNA;CD-box           |

|          |          |     |      |       |              |         |         |        |         |    |                |
|----------|----------|-----|------|-------|--------------|---------|---------|--------|---------|----|----------------|
| Tmc_1782 | KC353131 | 104 | High | 9034  | supercont2.2 | 1801544 | 1801647 | 3'UTR  | RF00026 | U6 | snRNA;splicing |
| Tmc_2839 | KC353226 | 186 | High | 11647 | supercont2.4 | 948628  | 948443  | 5' UTR | no      | no | ncRNA          |
| Tmc_681  | KC353044 | 211 | High | 15583 | supercont2.1 | 3061687 | 3061897 | 5' UTR | RF00020 | U5 | snRNA;splicing |

\*Low: Reads number < 10, Low abundant ncRNAs; High: Reads number >100, High abundant ncRNAs
