# Supplementary material for: Identification and characterisation of non-coding small RNAs in the pathogenic filamentous fungus Trichophyton rubrum
Source: PubMed Central journal article supplement (PMC3890542; doi:10.1186/1471-2164-14-931), 2013-12-30
Supplement: 1471-2164-14-931-S2.pdf [file 1471-2164-14-931-S2.pdf]

FIG. S2

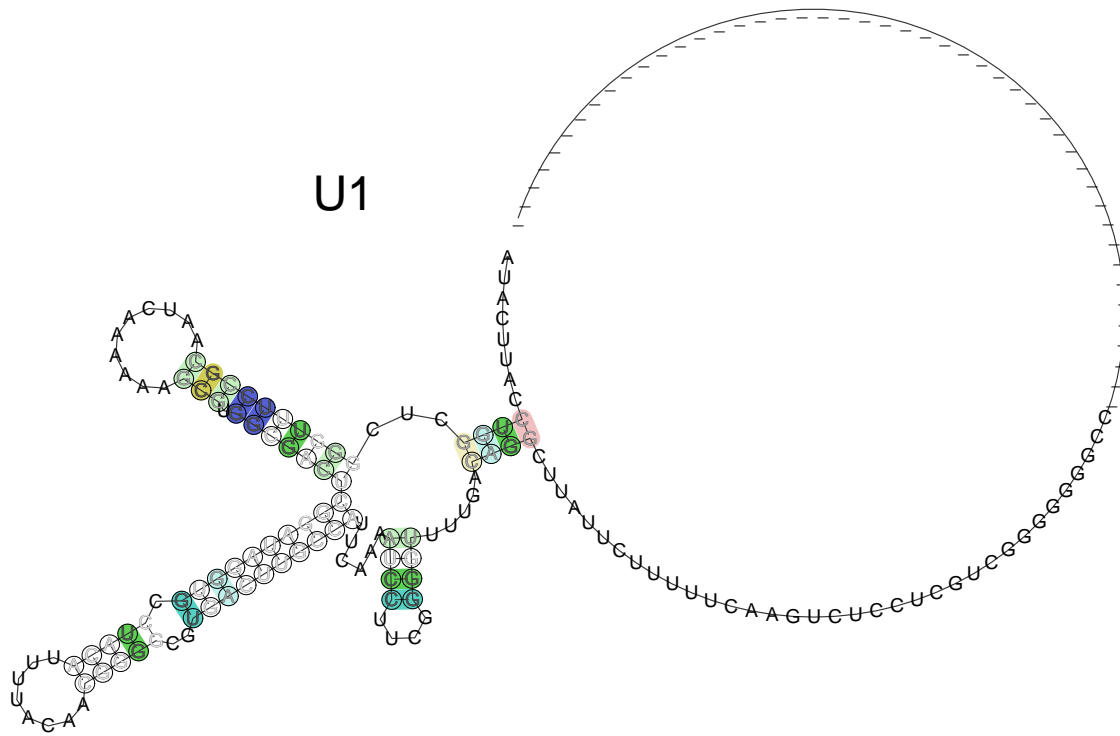

|                      |                                                               |    |
|----------------------|---------------------------------------------------------------|----|
| <i>T. rubrum</i>     | AUACUUACCUUGUUUGGGCUGGCGCGAU-CAAAAAGGC--GCUUCGCCGUGGAAAAGGCUC | 57 |
| <i>T. equinum</i>    | AUACUUACCUUGUUUGGGCUGGCGCGAU-CAAAAAGGC--GCUUCGCCGUGGAAAAGGCUC | 57 |
| <i>A. fumigatus</i>  | AUACUUACCUUGUUUGGGUGGCGCGAU-CAAGAAGGC--GGUCCACCACGGAUUGGUCC   | 57 |
| <i>A. niger</i>      | AUACUUACCUUGUUUGGGUGACUGCGAU-CAAGAAGGC--GGUCCACCACGGAUUGGUCC  | 57 |
| <i>R. oryzae</i>     | AUACUUACCUUGGUCGUGUAUUCGGAU-CAAGAAUCCCGAAUAUACAGUGAAAAGUGGUU  | 59 |
| <i>S. pombe</i>      | UUACUUACCUUGCAUGAGUUUCUGCAGCACAAAGAAUUGUGGAGACUCAGUU-AUUUGUCU | 59 |
| <i>S. octosporus</i> | UUACUUACCUUGGCACGGGUUUUCGAGCUCAAAGAAUUGUGGAAUUCAGCU-GUUUGUCU  | 59 |
|                      | ***** * * * * * * * * *                                       |    |

|                      |                                                             |     |
|----------------------|-------------------------------------------------------------|-----|
| <i>T. rubrum</i>     | CUACAUUGCAC---AGCG-UGGAGAGCCUUGCCACUCAACAUCUUCGGGGUUUUGACAG | 113 |
| <i>T. equinum</i>    | CUACAUUGCAC---AGCG-UGGAGAGCCUUGCCACUCAACAUCUUCGGGGUUUUGACAG | 113 |
| <i>A. fumigatus</i>  | CUGCAUUGCAC---AGCG-CGGCGGAACAUCGCUUCAACGGCCUUCGGGUCAUUGACAG | 113 |
| <i>A. niger</i>      | CUGCAUUGCAC---AGCG-CGGCGGAACAUCGCUUCAACGGCCUUCGGGUCAUUGACAG | 113 |
| <i>R. oryzae</i>     | GU-CAUUGCAC---AGCGACCUGUUUUUGCUGCG-AACGCUCUUCGGGGCUCUCGAG   | 114 |
| <i>S. pombe</i>      | UGGCAUUGCACUG-AGCCUGACGAA--UAACUGUG-GACUGGCUAAGGUCAGCUCGGA  | 115 |
| <i>S. octosporus</i> | UUGCAUUGCACUGUAGCUCUGACGGA--CAGUUGCG-GACUGGCUACGGUCAGAUCGAG | 116 |
|                      | ***** *** ** ** *                                           |     |

|                      |                                                         |     |
|----------------------|---------------------------------------------------------|-----|
| <i>T. rubrum</i>     | G-CAUAUUCUUUG-----GCACCUCUC-CUGGACU-CAGGUCCUACCUUUUUUCA | 162 |
| <i>T. equinum</i>    | G-CAUAUUCUUUG-----GCACCUCUC-CUGGACUUCGGGUCCUAC-----     | 152 |
| <i>A. fumigatus</i>  | G-CGUAUUCUUUG-----GCUCUAU-----                          | 132 |
| <i>A. niger</i>      | G-CGUAUUCUUUG-----GCACUUCUC-CU----UUUGGAGCUU-----       | 146 |
| <i>R. oryzae</i>     | AUCAUAAUUUUUGUUUUGGGGUAUUGGUGGUUCGCCGCGAGGCCCU-----     | 163 |
| <i>S. pombe</i>      | UGCAUCAUUUUUG-----AGUUCGUCCUCA--UUUGGGGCA-----          | 150 |
| <i>S. octosporus</i> | UGCAUCAUUUUUG-----AGUUCGUCUCU-G--UUAAGGAGACA-----       | 152 |
|                      | * * * * *                                               |     |

|                      |                                    |     |
|----------------------|------------------------------------|-----|
| <i>T. rubrum</i>     | UUUGUCUCUGCGCUUAUGUGCUGUUGCAAAGAAG | 196 |
| <i>T. equinum</i>    | -----                              |     |
| <i>A. fumigatus</i>  | -----                              |     |
| <i>A. niger</i>      | -----                              |     |
| <i>R. oryzae</i>     | -----                              |     |
| <i>S. pombe</i>      | -----                              |     |
| <i>S. octosporus</i> | -----                              |     |

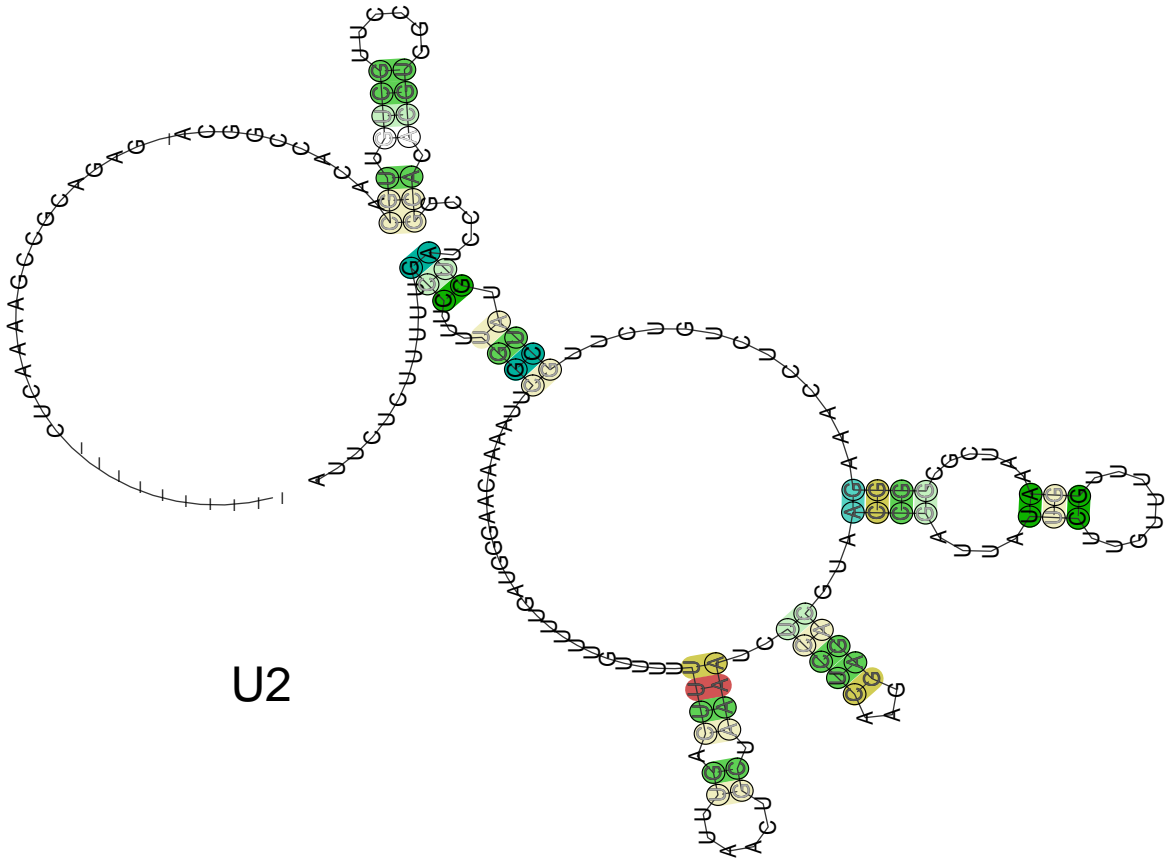

U2

```

T. rubrum      ---GCUCUCUUUGCCAUAUAUGGCUUAGAUAAGUGUAGUAUCUGUUCUUUUCAGUUAAU  57
A. nidulans    CCAGCUCUCUUUGCCUUU-UGGCUUAGAUAAGUGUAGUAUCUGUUCUUUUCAGUUAAU  59
S. octosporus -AUUCUCUCUUUGCCUUU-UGGCUUAGAUAAGUGUAGUAUCUGUUCUUUUCAGUUAAU  58
S. japonicus  -AUUCUCUCUUUGCCUUU-UGGCUUAGAUAAGUGUAGUAUCUGUUCUUUUCAGUUAAU  58
S. cerevisiae ----AUCUCUUUGCCUUU-UGGCUUAGAUAAGUGUAGUAUCUGUUCUUUUCAGUGUAA  55
                ***** ** *****

```

```

T. rubrum      CUCUGAAAGUAUUCUAAGGAAUACGAAAGUGAUUAUUCUUUUUUUGUACCGCGGAUUA  117
A. nidulans    CUCUGAAAGUGUUCUAAGGAAACACAACAUUGAUUAAUCUUUUUUUGGAUCUCGUGGCAG  119
S. octosporus CGCUGAAAUCCGCCUCACUGAG-GUGUUUCCGAUUAUUCUUGUUUUUGGUUUUUGCUGGAA  117
S. japonicus  CGCUGAAAUACCCCAUCGGG-GUGUUUCCGAUUAUUCUUGUUUUUGGAAUCCGCCGAGA  117
S. cerevisiae AACUGAAAUAGACCUCAAUGAG-----GCUCA--UUACCUUU-UAAUUUGUUAACA  102
                ***** * * * * * ** ** *

```

```

T. rubrum      GACCUCUGUGCUUGCGCAUGUCUUUUCGCACCG-UGUCAUCCGGUCUACACUACCACCGA  176
A. nidulans    GGCCUCUGUGCUUGCGCAUGCCUUGCCACAUAG-UGUCAUUGGGCUACACUACCCCAA  178
S. octosporus AGCCUCUG-GCUUGC-UAUGUUUCCGGCACC GGUGUCCUUGCUAUUGCACUACCCGCAA  175
S. japonicus  GACCUAUG-GCUUGC-UAUGUCUUCUGGCACC GGUGUCCUUGCCUUGCACUCCUGGCAU  175
S. cerevisiae UAC-----ACAUUUUUUGGCACC-----CAAAUUAUAA-AA  133
                * * * * * ** * *

```

```

T. rubrum      UCGACGC-GAACCUACCUCUUUUUUC  201
A. nidulans    UCGACGC-GAACC-----CUU-----  193
S. octosporus GAGACGCCGAAUC-----AUC-----  191
S. japonicus  GCGACGCCGAAAA-----CUC-----  191
S. cerevisiae UGGACGG-GAA-----  143
                **** ***

```

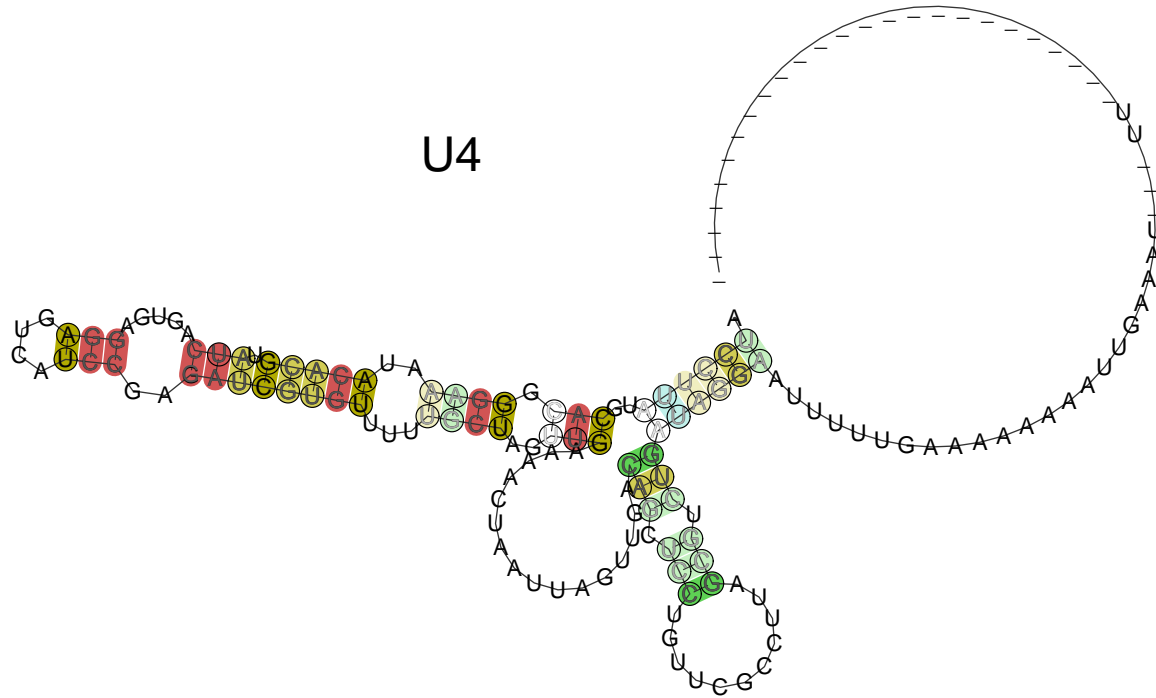

|                 |                                                               |     |
|-----------------|---------------------------------------------------------------|-----|
| A. fumigatus    | AUCCUGGUGCACGGGUUUACACGUGUCAGUGAGGAGACAUCCGAGACCGUGUUUUUGCU   | 60  |
| A. oryzae       | AUCCUAGUGCACGGGCAAUACACGUAUCAGUGAGGAGACAUCCGAGAUUCGUGUUUUUGCU | 60  |
| A. nidulans     | AUCCUGGUGCAAGGGUUUACACGUGUCAGUGAGGAGCAUCCGAGACCGUGUUUUUGCU    | 60  |
| T. rubrum       | ----GAGUGCAAGGGUUUACGUUU-CCAGUGAAGGUUCGCCUGAGGCAACGUUUUUGCU   | 55  |
| S. kudriavzevii | AUCCUUAUGCACGGGAAAUACGCAUAUCAGUGAGGAUUCGUCCGAGAUUGUGUUUUUGCU  | 60  |
| S. castelliiU4  | AUCCUUAUGCACGGGAAAUACGCAUAUCAGUGAGGAUUCGUCCGAGAUUGUGUUUUUGCU  | 60  |
| Candida         | GUCUUUAUGCAGGGCAUACGUGUAUCAGUGAGGAUUCGUCCGAGAUUGUGUUUUUGCU    | 60  |
|                 | **** * * * * * * * * * * * * * * * * * *                      |     |
| A. fumigatus    | AGUUGAAA-----ACUACCUAGU--UGACCGCUC--CAG---UUGGUCU             | 97  |
| A. oryzae       | AGUUGAAA-----ACUAAUUUUU--UGACCGCUC--UAG---UUGGCCU             | 97  |
| A. nidulans     | AGUUGAAA-----ACUACCUAGU--UGACCGCUC--CAA---UUGGCCU             | 97  |
| T. rubrum       | AGUUGAAA-----ACUACAAACCAAUGACCGCUC--UAG---UUGGUCU             | 94  |
| S. kudriavzevii | GGUUGAAAUUAAUUUAUAAACCAGACCGUCUCCUCAUGGUCGCUUAUCGG-UGUUCGCUU  | 119 |
| S. castelliiU4  | GGUUGAAAUUAAUU--AAACCAGACCGUCUCCUCAUUGUCGCCAGUUAGAUGUUCGCUU   | 118 |
| Candida         | GGUUGAAA--ACUU--AAACCUGAC-AACUUCU--UGAAUGCUA--UAG-UAUUUUACU   | 109 |
|                 | ***** ** * ** ** *                                            |     |
| A. fumigatus    | U-CGGA---UCG-----GCUGGGAAUUUUUGAAAAAAGUUGCCUGACAUCCUAAG       | 145 |
| A. oryzae       | U-CGGG---UCG-----GCUAGGAAUUUUUGAAAACAAACUGCCUGGC-UCAUA--      | 142 |
| A. nidulans     | U-AGGG---UCG-----GUUGGGAAUUUUUGAACA-----CUUAA---AGAAA         | 133 |
| T. rubrum       | U-CGGA---UCG-----GCUGGGAAUUUUUGAAGAA-----                     | 121 |
| S. kudriavzevii | U-UGAAUACUUC AAGCUAUGUAGGGAAUUUUUGGAA-----                    | 155 |
| S. castelliiU4  | CAUGAACAUUCU- GAUAAUGUAGGGAAUUUUUGGAAUACUUUUUAUU-----         | 164 |
| Candida         | UGUGUG---UUUA-----AGAGAAUUUUUGGAACCAUU-----                   | 140 |
|                 | * * ***** *                                                   |     |
| A. fumigatus    | UCUUGGUGUCAGUUUU                                              | 161 |
| A. oryzae       | -UUUG-----                                                    | 146 |
| A. nidulans     | -----                                                         |     |
| T. rubrum       | -----                                                         |     |
| S. kudriavzevii | -----                                                         |     |
| S. castelliiU4  | -----                                                         |     |
| Candida         | -----                                                         |     |

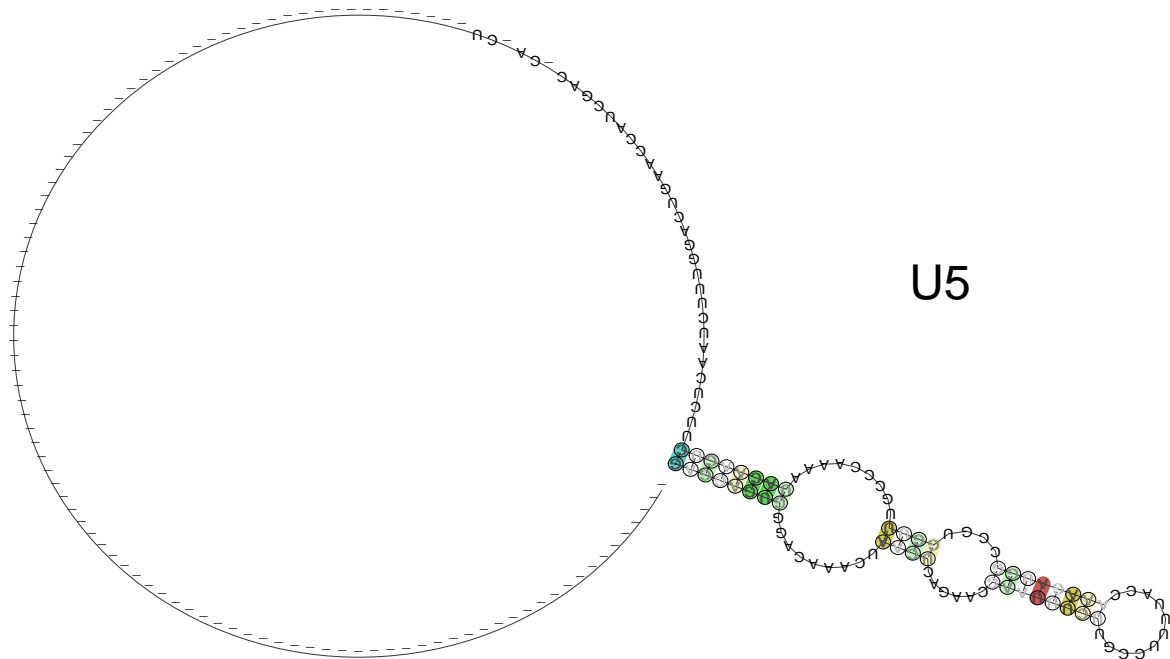

|                        |                                                                 |    |
|------------------------|-----------------------------------------------------------------|----|
| <i>S. pombe</i>        | -GUCAAAGCACUUUGC AAAAGCUA--AC-GUAUCUGUUUCUUGCCUUUUACCAGAAACAG   | 56 |
| <i>S. kudriavzevii</i> | -UUUGUUGC---CUACAGAACUUUAUAC-GAACAUUGGUUCUUGCCUUUUACCAGAACCAU   | 55 |
| <i>A. fumigatus</i>    | ----GAGGAG--UGGGACAAGCUAGCUCAGAAACCCAUUUUCUUGCCUUUUACCAGAGAUGG  | 54 |
| <i>A. clavatus</i>     | ----GAGGAG--UGGGACAAGCUAGCUCAGAAACCCAUUUUCUUGCCUUUUACCAGAGAUGG  | 54 |
| <i>A. niger</i>        | ----GAGGAG--UGGGACAAAACUAGCUCAGAAACCCAUUUUCUUGCCUUUUACCAGAGAUGG | 54 |
| <i>T. rubrum</i>       | CUGCGAGGAG--UGGGACAAAACUAGCUCAGAAUCCAUUUCUUGCCUUUUACCAGAGAUGG   | 58 |
| <i>R. oryzae</i>       | -----UACUUCUGUCUUGUGCUCAUAUUCGGAUAAAUCUUUCGCCUUUUACUAAAGAUUU    | 54 |
|                        | * * * * *                                                       |    |

|                        |                                                               |     |
|------------------------|---------------------------------------------------------------|-----|
| <i>S. pombe</i>        | CCGUUUGUAAGGUGUGCUAAU-UUGACUGU-----AUAGUUUUUGAAUCUUUU--UCUUG  | 108 |
| <i>S. kudriavzevii</i> | CCGGGUGU---UGUCUCCAU-UAAA-----ACAGGC-----A                    | 83  |
| <i>A. fumigatus</i>    | CCGUG-GC---UU-GCCCAA-CAUACUCCUCUUCUCAAUUCUUUGGACCUUU-----     | 99  |
| <i>A. clavatus</i>     | CCGUG-GC---UU-GCCCAA-AAUACUCCUCUUCUCAAUUCUUUGGACCUUAUC--CAUCG | 105 |
| <i>A. niger</i>        | CCGUG-GU---UU-GCCCAA-AAGACUCCUCUCAUCAAUUCUUUGGAAUCACC--CAUCG  | 105 |
| <i>T. rubrum</i>       | CCGUG-GU---UUUGCCCAU-AAUACUCCGCUCACCAAUUCUUUGAACCUCCGAAUAUCG  | 112 |
| <i>R. oryzae</i>       | CCGUGGAUGC GGGACACUAAAAGAAUUAAC----CCGAAUUUUUUGG-----UA       | 99  |
|                        | *** * *                                                       |     |

|                        |                  |     |
|------------------------|------------------|-----|
| <i>S. pombe</i>        | AAACAU-----      | 114 |
| <i>S. kudriavzevii</i> | AAGC-----        | 87  |
| <i>A. fumigatus</i>    | -----            |     |
| <i>A. clavatus</i>     | ACACAGCUGUCGAUU- | 120 |
| <i>A. niger</i>        | ACACAGCUGUC----- | 116 |
| <i>T. rubrum</i>       | ACA-----         | 115 |
| <i>R. oryzae</i>       | AAACCCUCUCUUUUUC | 115 |

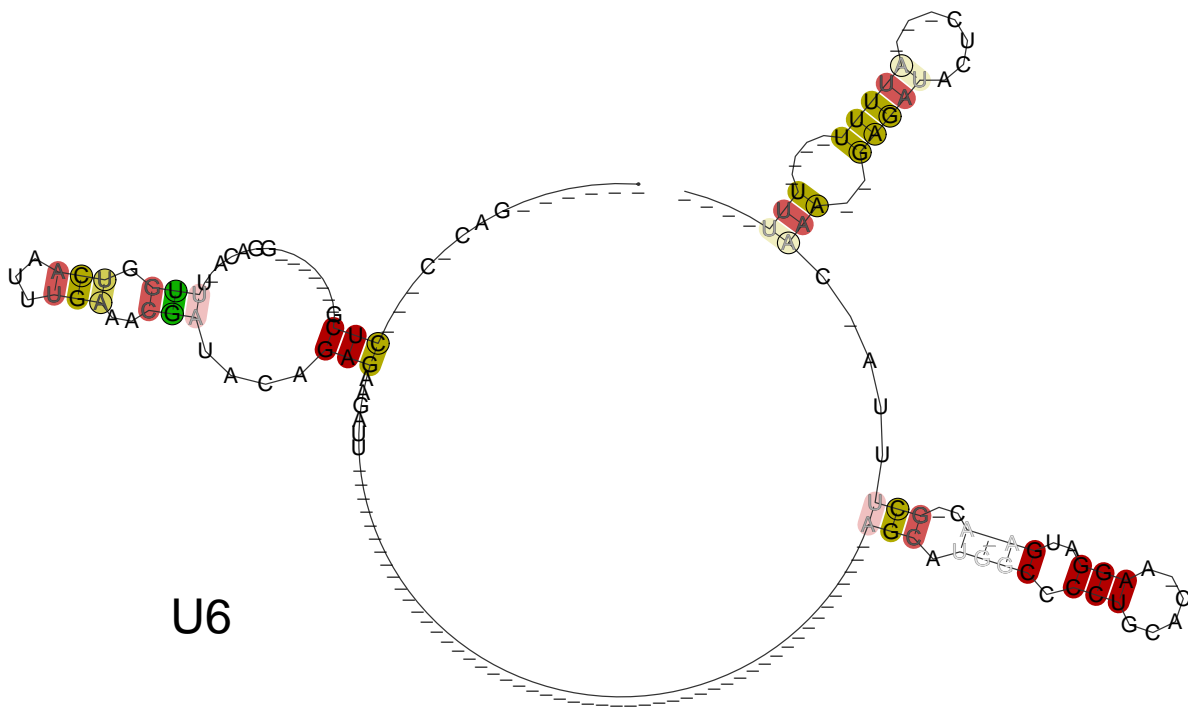

|                     |                                                               |     |
|---------------------|---------------------------------------------------------------|-----|
| <i>S. castellii</i> | GGC---AACCC---CUCG-----UGGACA-UUUGGUCAAUUUGAAACAUAACAGAGAUG   | 47  |
| <i>S. kluyveri</i>  | GUCCAAGACAU---UUCGGUGUUUUGGACA-UUUGGUCAAUUUGAAACAUAACAGAGAUG  | 56  |
| <i>T. rubrum</i>    | -----GC-C---UUCG-----GGCA-UUUGGUCA--UAGUAACGAUACAGAGAAG       | 38  |
| <i>A. oryzae</i>    | -----GC-C---CUCG-----AGGCA-UCCGGUCAAUUUUGAAACGAUACAGAGAAG     | 41  |
| <i>S. pombe</i>     | -----UGAU-C---UUCG-----GAUCACUUUGGUCAAUUUGAAACGAUACAGAGAAG    | 44  |
| <i>A. niger</i>     | ----UGGACAUAUGCUCG-----ACA---UUGCUAUUUGGAACGAUACAGAGACG       | 44  |
|                     | *** ** * * * * * * * * * * *                                  |     |
| <i>S. castellii</i> | AUC-----AGCAGUU                                               | 57  |
| <i>S. kluyveri</i>  | AUC-----AGCAGUU                                               | 66  |
| <i>T. rubrum</i>    | AUU-----AGCAUGG                                               | 48  |
| <i>A. oryzae</i>    | AUU-----AGCAUGG                                               | 51  |
| <i>S. pombe</i>     | AUUGUAAGUAACAUAUUUACCAAGGUUCGAGUCAUACUAACUCGUUGUUUAGAGCAUGG   | 104 |
| <i>A. niger</i>     | AU-----AGCAUGU                                                | 53  |
|                     | ** *****                                                      |     |
| <i>S. castellii</i> | CCCCUGCAU-AAGGAUGA-ACCGUUUUA-CAAA--GAGAUUUA-UUCGUUUU----UU--  | 105 |
| <i>S. kluyveri</i>  | CCCCUGCAU-AAGGAUGA-ACCGUUUUA-CAAA--GAGAUUUAUUCAUUUU----U---   | 114 |
| <i>T. rubrum</i>    | CCCCUGCACUAAGGAUGACAC-GCUCAAUCAA--GAGAAGCUACCAGUUUU----UUUU   | 101 |
| <i>A. oryzae</i>    | CCCCUGCAC-AAGGUUGACAC-GCUUUUAUCAAG--GAGAUGCUA--AACUUU----UUU- | 100 |
| <i>S. pombe</i>     | CCCCUGCAC-AAGGAUGACACUGCGACAUUGAG--AGAAAACCC--AUUUU----UUU-   | 153 |
| <i>A. niger</i>     | CCCCUGCGC-AAGGAUGA----CGUUA-CAAUUCGAGAUUUC--GUUUUAGGCUUUU     | 103 |
|                     | ***** ** * * * * * * * * *                                    |     |
| <i>S. castellii</i> | ---                                                           |     |
| <i>S. kluyveri</i>  | ---                                                           |     |
| <i>T. rubrum</i>    | UGG 104                                                       |     |
| <i>A. oryzae</i>    | ---                                                           |     |
| <i>S. pombe</i>     | ---                                                           |     |
| <i>A. niger</i>     | ---                                                           |     |

FIG. S2 Secondary structures prediction of aligned snRNAs.

*T. rubrum* snRNAs are compared with the homologs in other fungi using the multiple sequence alignment software Clustal W2. The secondary structures of aligned sequences are predicted by RNAalifold [27, 28]. The color of the bases changes from black to grey if one or more sequences in the alignments deviate from the consensus. If the homologous sequences shows a gap in the alignment, the gap character (-) will be signed in the secondary structures graphs. The results show that these snRNAs are with conserved regions in the hairpin loops.
