# Supplementary material for: Identification and characterisation of non-coding small RNAs in the pathogenic filamentous fungus Trichophyton rubrum
Source: PubMed Central journal article supplement (PMC3890542; doi:10.1186/1471-2164-14-931), 2013-12-30
Supplement: 1471-2164-14-931-S4.pdf [file 1471-2164-14-931-S4.pdf]

#### S4. Converted sncRNAs in all seven dermatophytes

| Name     | Classes                 | Len (nt) | Reads | Genome Location |         |         | Hmologos name in Rfam |           |               |
|----------|-------------------------|----------|-------|-----------------|---------|---------|-----------------------|-----------|---------------|
|          |                         |          |       | Chromosome      | start   | end     | position              | Accession | Name          |
| Tmc_293  | ncRNA                   | 116      | 917   | supercont2.1    | 1477742 | 1477627 | 3'UTR                 | no        | no            |
| Tmc_305  | ncRNA                   | 97       | 579   | supercont2.1    | 1515685 | 1515781 | Intron                | no        | no            |
| Tmc_500  | ncRNA                   | 203      | 1     | supercont2.1    | 2298649 | 2298447 | Intron                | no        | no            |
| Tmc_611  | ncRNA                   | 104      | 1     | supercont2.1    | 2710988 | 2711091 | Intron                | no        | no            |
| Tmc_718  | ncRNA                   | 122      | 1     | supercont2.1    | 3334692 | 3334571 | Intron                | no        | no            |
| Tmc_733  | ncRNA                   | 174      | 1     | supercont2.1    | 3371115 | 3371288 | 3'UTR                 | no        | no            |
| Tmc_789  | ncRNA                   | 248      | 1     | supercont2.1    | 3618013 | 3618260 | 5'UTR                 | no        | no            |
| Tmc_155  | ncRNA; SscA RNA         | 102      | 1     | supercont2.1    | 749414  | 749313  | Intron                | RF00063   | SscA          |
| Tmc_161  | ncRNA;pri- or pre-miRNA | 91       | 1     | supercont2.1    | 792780  | 792870  | 5'UTR                 | no        | mir-574       |
| Tmc_112  | ncRNA;pri- or pre-miRNA | 100      | 2     | supercont2.1    | 553233  | 553134  | 3'UTR                 | RF01059   | mir-598       |
| Tmc_512  | ncRNA;pri- or pre-miRNA | 195      | 1     | supercont2.1    | 2323310 | 2323504 | Intron                | no        | mir-598       |
| Tmc_608  | snoRNA;CD-box           | 234      | 1     | supercont2.1    | 2701229 | 2701462 | 3'UTR                 | RF01202   | sn2991        |
| Tmc_640  | snoRNA;CD-box           | 129      | 2     | supercont2.1    | 2869815 | 2869687 | 3'UTR                 | RF00300   | snoZ221       |
| Tmc_338  | snoRNA;CD-box           | 135      | 44    | supercont2.1    | 1643180 | 1643314 | Intron                | RF01223   | snR13         |
| Tmc_415  | snoRNA;CD-box           | 103      | 1     | supercont2.1    | 1918108 | 1918210 | Intron                | RF01121   | Sr38          |
| Tmc_801  | snoRNA;CD-box           | 488      | 919   | supercont2.1    | 3681448 | 3681935 | 3'UTR                 | RF00012   | U3            |
| Tmc_817  | snoRNA;HACA-box         | 188      | 323   | supercont2.1    | 3719705 | 3719892 | 3'UTR                 | no        | no            |
| Tmc_774  | snRNA;splicing          | 201      | 163   | supercont2.1    | 3545014 | 3545214 | 3'UTR                 | RF00004   | U2            |
| Tmc_681  | snRNA;splicing          | 211      | 15583 | supercont2.1    | 3061687 | 3061897 | 5'UTR                 | RF00020   | U5            |
| Tmc_877  | ncRNA                   | 97       | 2     | supercont2.10   | 76955   | 77051   | 3'UTR                 | no        | no            |
| Tmc_956  | ncRNA                   | 241      | 2     | supercont2.10   | 559285  | 559525  | 5'UTR                 | no        | no            |
| Tmc_1008 | ribozyme                | 419      | 41    | supercont2.10   | 748640  | 749058  | 3'UTR                 | RF00030   | RNase_MRP     |
| Tmc_1010 | snoRNA;CD-box           | 87       | 80    | supercont2.10   | 749220  | 749306  | 3'UTR                 | RF00477   | snoSnR66      |
| Tmc_1167 | ncRNA                   | 177      | 1     | supercont2.11   | 544895  | 545071  | 3'UTR                 | no        | no            |
| Tmc_1211 | ncRNA                   | 165      | 1     | supercont2.11   | 718257  | 718093  | Intron                | no        | no            |
| Tmc_1344 | ncRNA                   | 289      | 1     | supercont2.13   | 260355  | 260643  | 3'UTR                 | no        | no            |
| Tmc_1299 | snoRNA;CD-box           | 109      | 1     | supercont2.13   | 24837   | 24729   | Intron                | RF00593   | snoU83B       |
| Tmc_1357 | ribozyme                | 208      | 1     | supercont2.14   | 153790  | 153997  | 5'UTR                 | RF00621   | CoTC_ribozyme |
| Tmc_1359 | snoRNA;CD-box           | 97       | 290   | supercont2.14   | 159345  | 159441  | Intron                | RF00475   | snoSnR69      |
| Tmc_1415 | ncRNA                   | 140      | 2     | supercont2.16   | 82202   | 82063   | 5'UTR                 | no        | no            |
| Tmc_1423 | ncRNA                   | 305      | 3     | supercont2.16   | 86158   | 86462   | 3'UTR                 | no        | no            |
| Tmc_1686 | ncRNA                   | 133      | 126   | supercont2.2    | 1303987 | 1304119 | 3'UTR                 | no        | no            |
| Tmc_1702 | ncRNA                   | 375      | 2     | supercont2.2    | 1373166 | 1372792 | 3'UTR                 | no        | no            |
| Tmc_1801 | ncRNA                   | 209      | 2     | supercont2.2    | 1873103 | 1873311 | Intron                | no        | no            |
| Tmc_1792 | ncRNA                   | 251      | 1     | supercont2.2    | 1856556 | 1856806 | Intron                | no        | no            |
| Tmc_1808 | ncRNA                   | 283      | 2     | supercont2.2    | 1884802 | 1885084 | Intron                | no        | no            |
| Tmc_1983 | ncRNA;pri- or pre-miRNA | 86       | 2     | supercont2.2    | 2887537 | 2887452 | 3'UTR                 | RF01059   | mir-598       |
| Tmc_1825 | snoRNA;CD-box           | 309      | 200   | supercont2.2    | 1958330 | 1958022 | 3'UTR                 | no        | no            |
| Tmc_1841 | snoRNA;CD-box           | 143      | 1     | supercont2.2    | 2090171 | 2090313 | 3'UTR                 | RF01144   | sR17          |
| Tmc_1560 | snoRNA;CD-box           | 77       | 1     | supercont2.2    | 546818  | 546894  | 3'UTR                 | RF01139   | sR2           |
| Tmc_1893 | snoRNA;HACA-box         | 344      | 21    | supercont2.2    | 2393882 | 2393539 | 3'UTR                 | no        | no            |
| Tmc_1472 | snoRNA;HACA-box         | 188      | 170   | supercont2.2    | 69663   | 69850   | 3'UTR                 | RF01258   | snR10         |
| Tmc_1782 | snRNA;splicing          | 104      | 9034  | supercont2.2    | 1801544 | 1801647 | 3'UTR                 | RF00026   | U6            |
| Tmc_2354 | ncRNA                   | 152      | 1     | supercont2.3    | 1735194 | 1735043 | Intron                | no        | no            |
| Tmc_2431 | ncRNA                   | 166      | 1     | supercont2.3    | 2070250 | 2070085 | 3'UTR                 | no        | no            |
| Tmc_2448 | ncRNA                   | 161      | 1     | supercont2.3    | 2123075 | 2122915 | 5'UTR                 | no        | no            |
| Tmc_2100 | ncRNA                   | 134      | 1     | supercont2.3    | 492158  | 492291  | Intron                | no        | no            |
| Tmc_2438 | ncRNA                   | 460      | 3     | supercont2.3    | 2078096 | 2078555 | 5'UTR                 | no        | no            |
| Tmc_2526 | ncRNA                   | 321      | 288   | supercont2.3    | 2582456 | 2582136 | 3'UTR                 | no        | no            |
| Tmc_2565 | ncRNA; Cis-reg          | 102      | 1     | supercont2.3    | 2757753 | 2757652 | Intron                | RF01068   | mini-ykkC     |
| Tmc_2163 | ncRNA;pri- or pre-miRNA | 137      | 4     | supercont2.3    | 874758  | 874894  | Intron                | RF00647   | mir164        |

|          |                         |     |       |              |         |         |            |         |               |
|----------|-------------------------|-----|-------|--------------|---------|---------|------------|---------|---------------|
| Tmc_2179 | snoRNA;CD-box           | 431 | 1     | supercont2.3 | 961995  | 961565  | Intergenic | no      | no            |
| Tmc_2405 | snoRNA;CD-box           | 317 | 1     | supercont2.3 | 1975149 | 1975465 | 3'UTR      | no      | no            |
| Tmc_2265 | snoRNA;CD-box           | 87  | 187   | supercont2.3 | 1276133 | 1276219 | Intron     | RF01197 | snR39         |
| Tmc_2545 | snoRNA;CD-box           | 119 | 27    | supercont2.3 | 2657688 | 2657806 | 3'UTR      | RF01188 | snR56         |
| Tmc_2594 | snoRNA;CD-box           | 143 | 2     | supercont2.3 | 2859175 | 2859033 | Intron     | RF01305 | sR51          |
| Tmc_2452 | snoRNA;HACA-box         | 323 | 1     | supercont2.3 | 2170039 | 2169717 | 3'UTR      | no      | no            |
| Tmc_2172 | snoRNA;HACA-box         | 126 | 1     | supercont2.3 | 922150  | 922025  | Intron     | RF00406 | SNORA42       |
| Tmc_2075 | snoRNA;HACA-box         | 96  | 5     | supercont2.3 | 425677  | 425772  | Intron     | RF00405 | SNORA44       |
| Tmc_2676 | ncRNA                   | 156 | 2     | supercont2.4 | 110438  | 110593  | 3'UTR      | no      | no            |
| Tmc_2821 | ncRNA                   | 268 | 1     | supercont2.4 | 837487  | 837220  | 5'UTR      | no      | no            |
| Tmc_2839 | ncRNA                   | 186 | 11647 | supercont2.4 | 948628  | 948443  | 5'UTR      | no      | no            |
| Tmc_2844 | ncRNA                   | 239 | 225   | supercont2.4 | 981025  | 981263  | 5'UTR      | no      | no            |
| Tmc_2704 | ncRNA                   | 80  | 1     | supercont2.4 | 350218  | 350297  | Intron     | no      | no            |
| Tmc_2966 | ncRNA                   | 103 | 1     | supercont2.4 | 1562900 | 1562798 | 3'UTR      | no      | no            |
| Tmc_2935 | ncRNA; Cis-reg          | 162 | 9     | supercont2.4 | 1403494 | 1403333 | Intron     | RF00220 | Rhino_CRE     |
| Tmc_2936 | snoRNA;CD-box           | 246 | 16    | supercont2.4 | 1403883 | 1403638 | Intron     | RF00312 | snoZ206       |
| Tmc_2898 | snoRNA;HACA-box         | 393 | 1     | supercont2.4 | 1199167 | 1198775 | Intron     | no      | no            |
| Tmc_2843 | snoRNA;HACA-box         | 225 | 56    | supercont2.4 | 976176  | 976400  | 3'UTR      | RF01251 | snR3          |
| Tmc_3157 | ncRNA                   | 177 | 1     | supercont2.5 | 328773  | 328597  | Intron     | no      | no            |
| Tmc_3176 | ncRNA                   | 137 | 1     | supercont2.5 | 423569  | 423705  | 3'UTR      | no      | no            |
| Tmc_3179 | ncRNA                   | 207 | 39    | supercont2.5 | 431925  | 431719  | 3'UTR      | no      | no            |
| Tmc_3237 | ncRNA                   | 164 | 673   | supercont2.5 | 722162  | 721999  | Intron     | no      | no            |
| Tmc_3392 | ncRNA                   | 180 | 1     | supercont2.5 | 1543669 | 1543848 | Intron     | no      | no            |
| Tmc_3269 | ncRNA; Cis-reg          | 121 | 1     | supercont2.5 | 832731  | 832611  | 3'UTR      | RF00180 | REN-SRE       |
| Tmc_3297 | snoRNA;CD-box           | 138 | 12    | supercont2.5 | 896392  | 896529  | 3'UTR      | RF00610 | SNORD110      |
| Tmc_3569 | ncRNA;pri- or pre-miRNA | 297 | 1     | supercont2.6 | 934438  | 934142  | Intron     | RF01059 | mir-598       |
| Tmc_3425 | snoRNA;CD-box           | 202 | 94    | supercont2.6 | 22581   | 22782   | 3'UTR      | no      | no            |
| Tmc_3426 | snoRNA;CD-box           | 98  | 761   | supercont2.6 | 23000   | 23097   | 3'UTR      | no      | no            |
| Tmc_3573 | snoRNA;CD-box           | 95  | 147   | supercont2.6 | 964586  | 964680  | Intron     | RF00530 | 10Me28S-Cm264 |
| Tmc_3509 | snoRNA;HACA-box         | 433 | 1     | supercont2.6 | 608530  | 608098  | 5'UTR      | no      | no            |
| Tmc_3585 | snoRNA;HACA-box         | 281 | 1     | supercont2.6 | 1065274 | 1064994 | Intron     | no      | no            |
| Tmc_3841 | ncRNA                   | 209 | 1     | supercont2.7 | 1169120 | 1169328 | 3'UTR      | no      | no            |
| Tmc_3725 | ncRNA; Cis-reg          | 139 | 1     | supercont2.7 | 440095  | 439957  | 3'UTR      | RF01088 | TLS-PK5       |
| Tmc_3783 | ncRNA;pri- or pre-miRNA | 80  | 1     | supercont2.7 | 784466  | 784545  | 3'UTR      | RF00990 | mir-552       |
| Tmc_3778 | snoRNA;CD-box           | 101 | 31    | supercont2.7 | 777627  | 777727  | 5'UTR      | RF00471 | snoSNR48      |
| Tmc_3741 | snoRNA;HACA-box         | 180 | 42    | supercont2.7 | 491853  | 492032  | 3'UTR      | RF01247 | snR32         |
| Tmc_4066 | ncRNA                   | 230 | 2     | supercont2.8 | 925945  | 926174  | 3'UTR      | no      | no            |
| Tmc_3999 | ncRNA                   | 178 | 5     | supercont2.8 | 672734  | 672557  | 3'UTR      | no      | no            |
| Tmc_3959 | no                      | 82  | 1     | supercont2.8 | 495724  | 495805  | 3'UTR      | no      | no            |
| Tmc_3911 | snoRNA;CD-box           | 80  | 3     | supercont2.8 | 194694  | 194773  | Intron     | RF00213 | snoR38        |
| Tmc_4113 | snoRNA;CD-box           | 681 | 22    | supercont2.8 | 1152047 | 1152727 | Intron     | RF01274 | sR45          |
| Tmc_4006 | snoRNA;HACA-box         | 251 | 28    | supercont2.8 | 710950  | 711200  | Intron     | RF01263 | snR191        |
| Tmc_3904 | snRNA;splicing          | 196 | 1238  | supercont2.8 | 159538  | 159733  | 5'UTR      | RF00003 | U1            |
| Tmc_4219 | ncRNA                   | 104 | 1     | supercont2.9 | 449429  | 449532  | 5'UTR      | no      | no            |
| Tmc_4267 | snoRNA;CD-box           | 100 | 10    | supercont2.9 | 703004  | 703103  | 3'UTR      | no      | no            |
| Tmc_4260 | snoRNA;CD-box           | 95  | 163   | supercont2.9 | 695194  | 695288  | Intergenic | RF01178 | snoR77Y       |
| Tmc_4263 | snoRNA;CD-box           | 157 | 486   | supercont2.9 | 695917  | 696073  | Intergenic | RF00086 | SNORD27       |
| Tmc_4259 | snoRNA;CD-box           | 104 | 892   | supercont2.9 | 693331  | 693434  | 5'UTR      | RF00276 | SNORD52       |
| Tmc_4264 | snoRNA;CD-box           | 88  | 23    | supercont2.9 | 696179  | 696266  | 5'UTR      | RF01207 | snR73         |
| Tmc_4262 | snoRNA;CD-box           | 273 | 603   | supercont2.9 | 695588  | 695860  | Intergenic | RF01185 | snR75         |
| Tmc_4261 | snoRNA;CD-box           | 138 | 5548  | supercont2.9 | 695445  | 695582  | Intergenic | RF01209 | snR76         |
